# Supplementary material for: Rhizomal Reclassification of Living Organisms
Source: MDPI journal article supplement (doi:10.3390/ijms22115643), 2021-05-26

### Figure 6 A: 16S – 18S rRNA gene

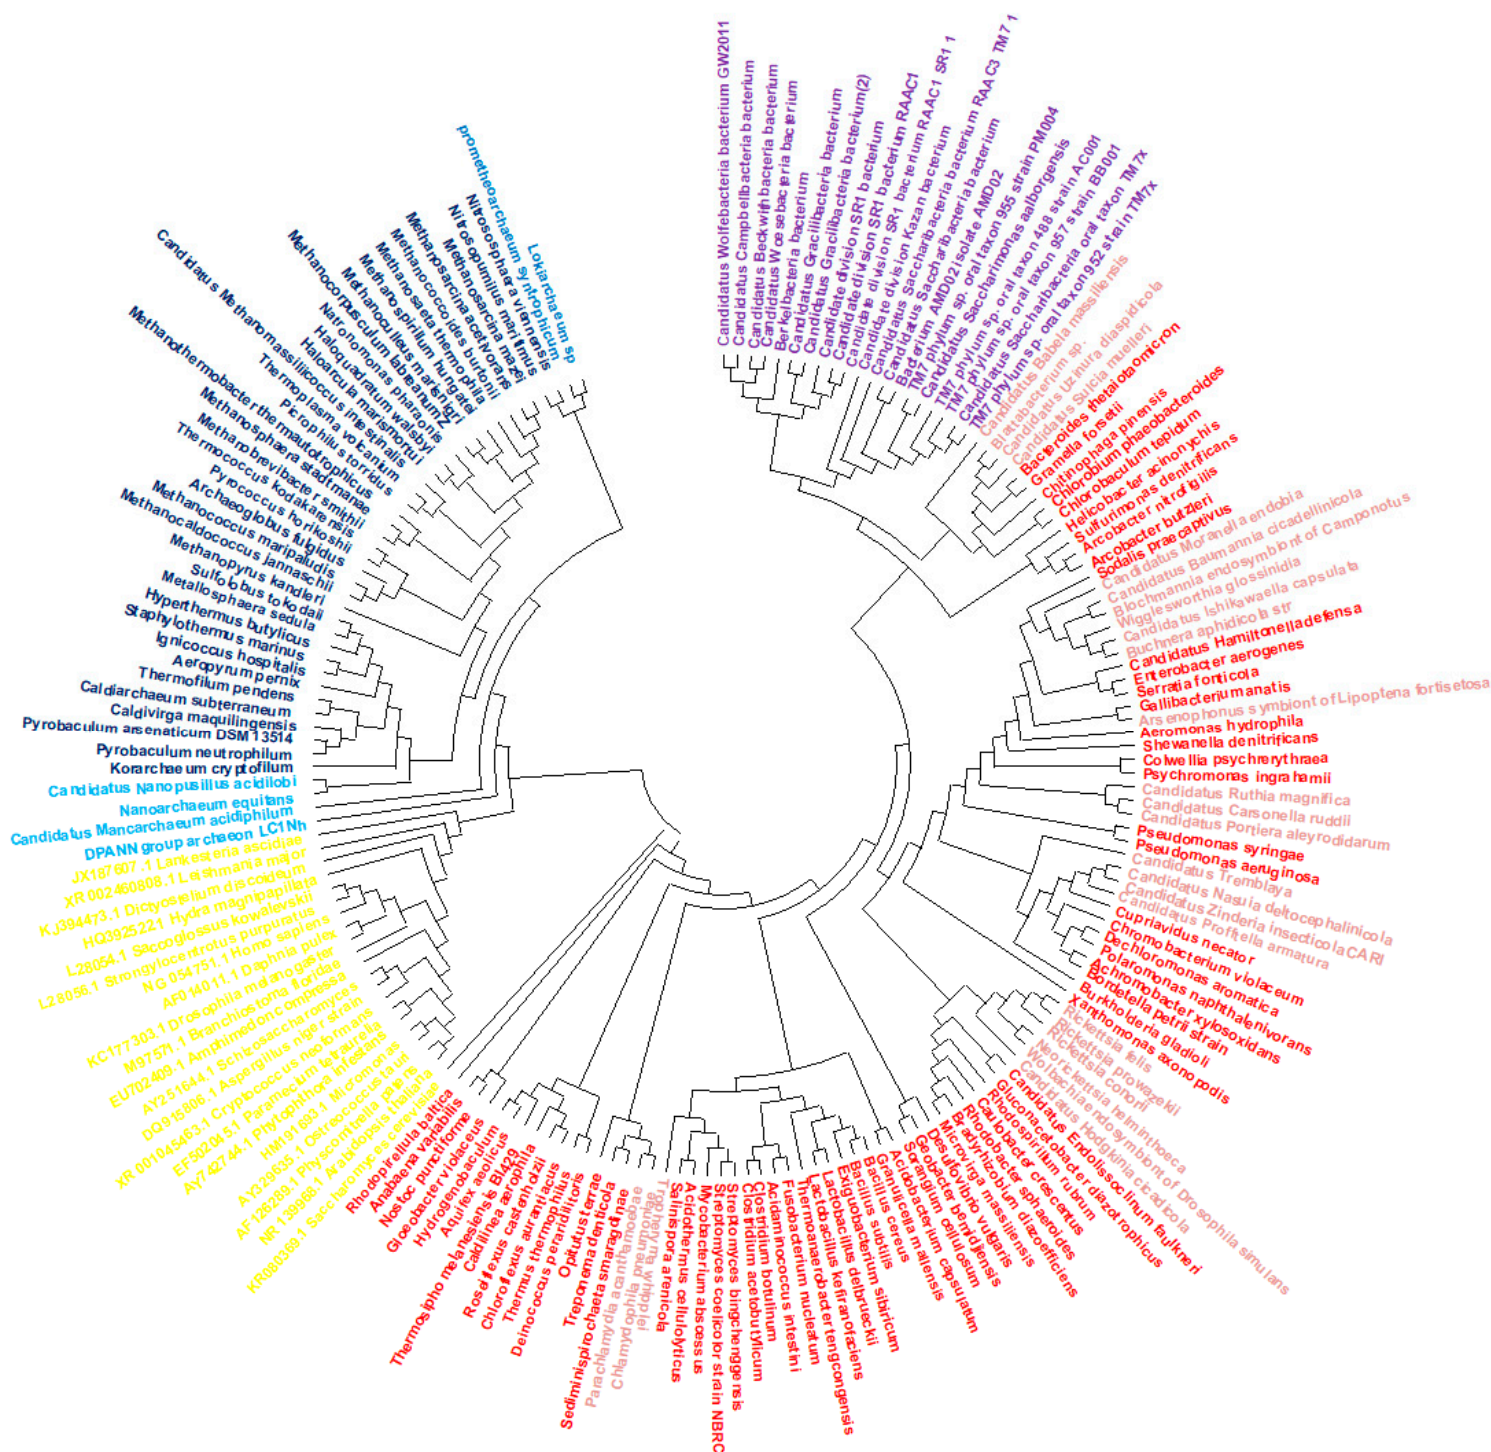

### Figure 6 B: 23S – 28S rRNA gene

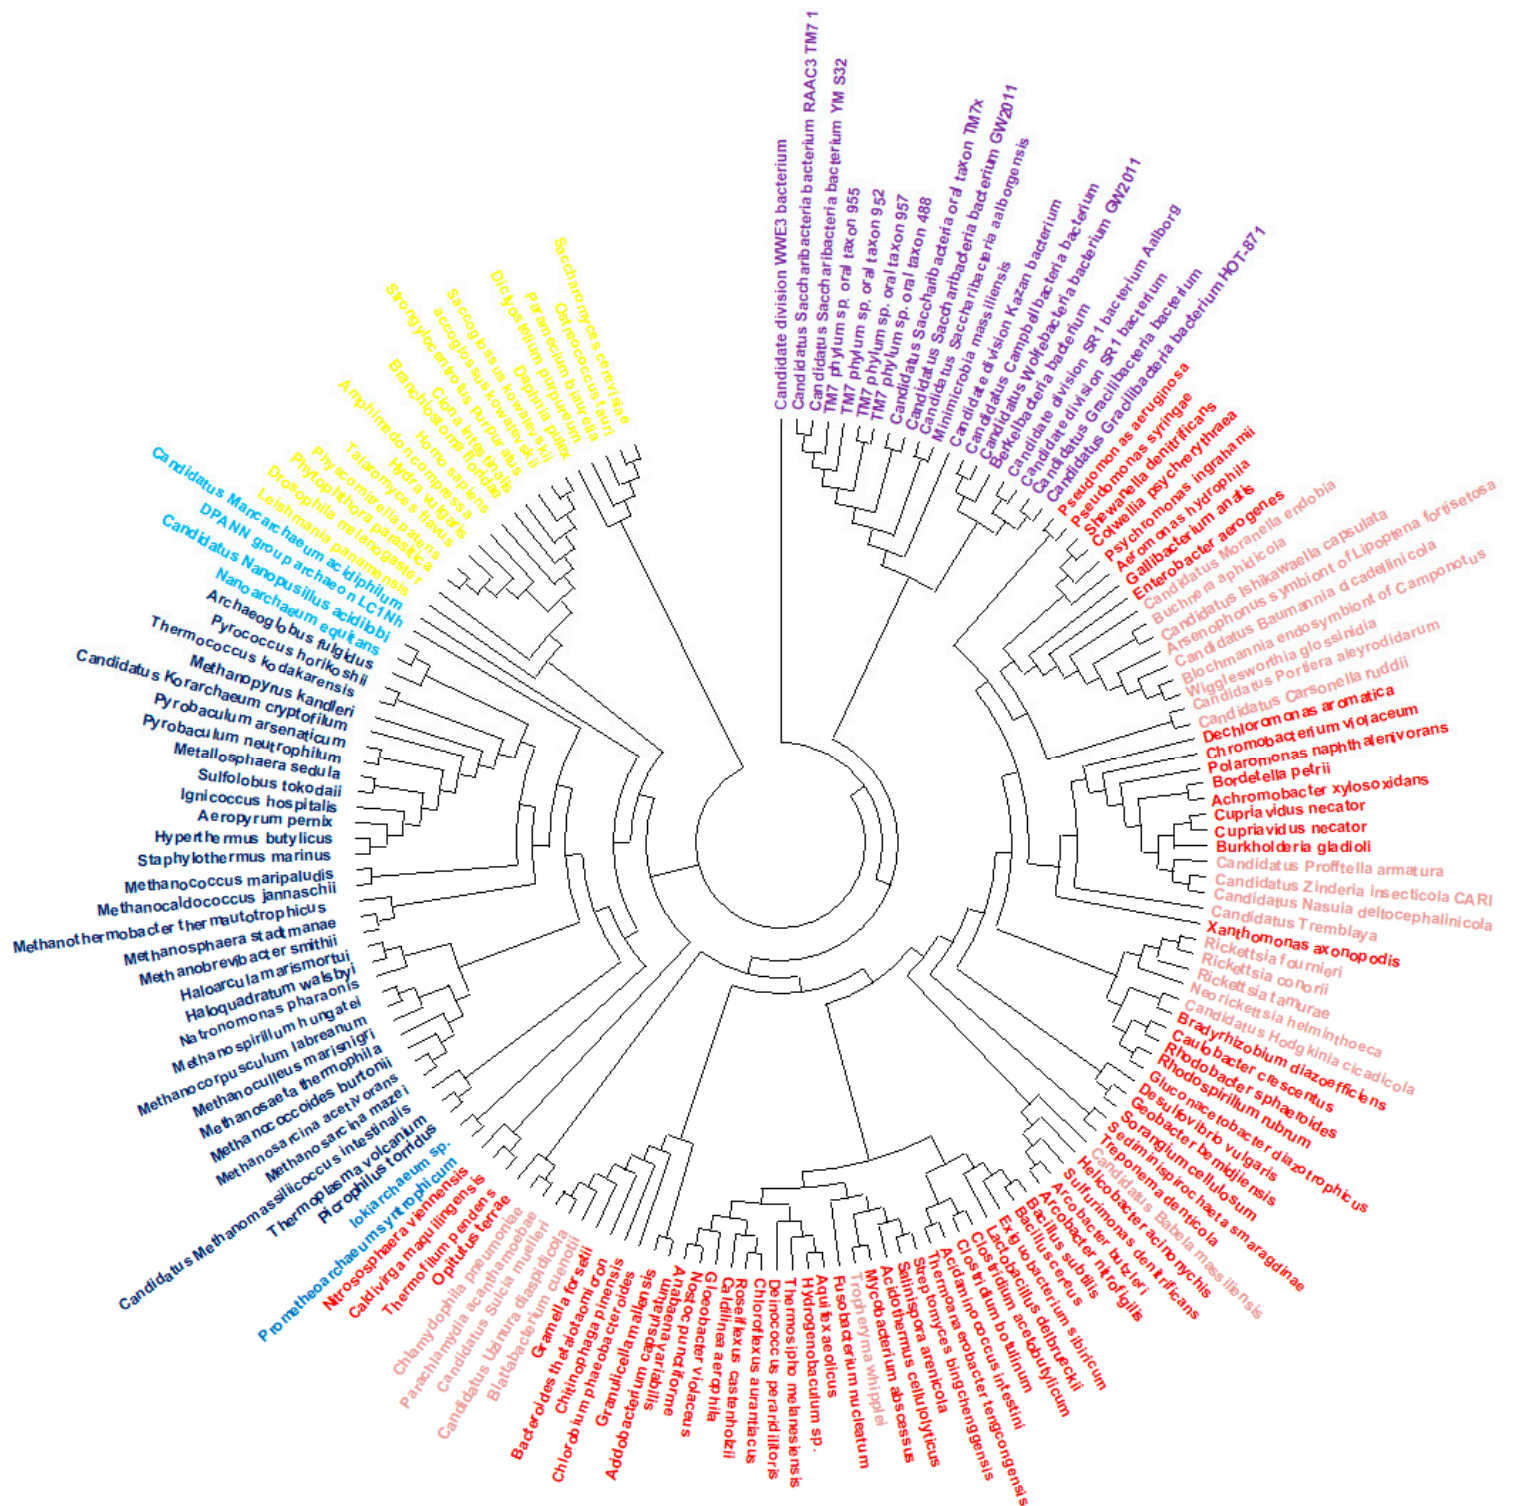



### Figure 6 C: DNA Polymerase gene

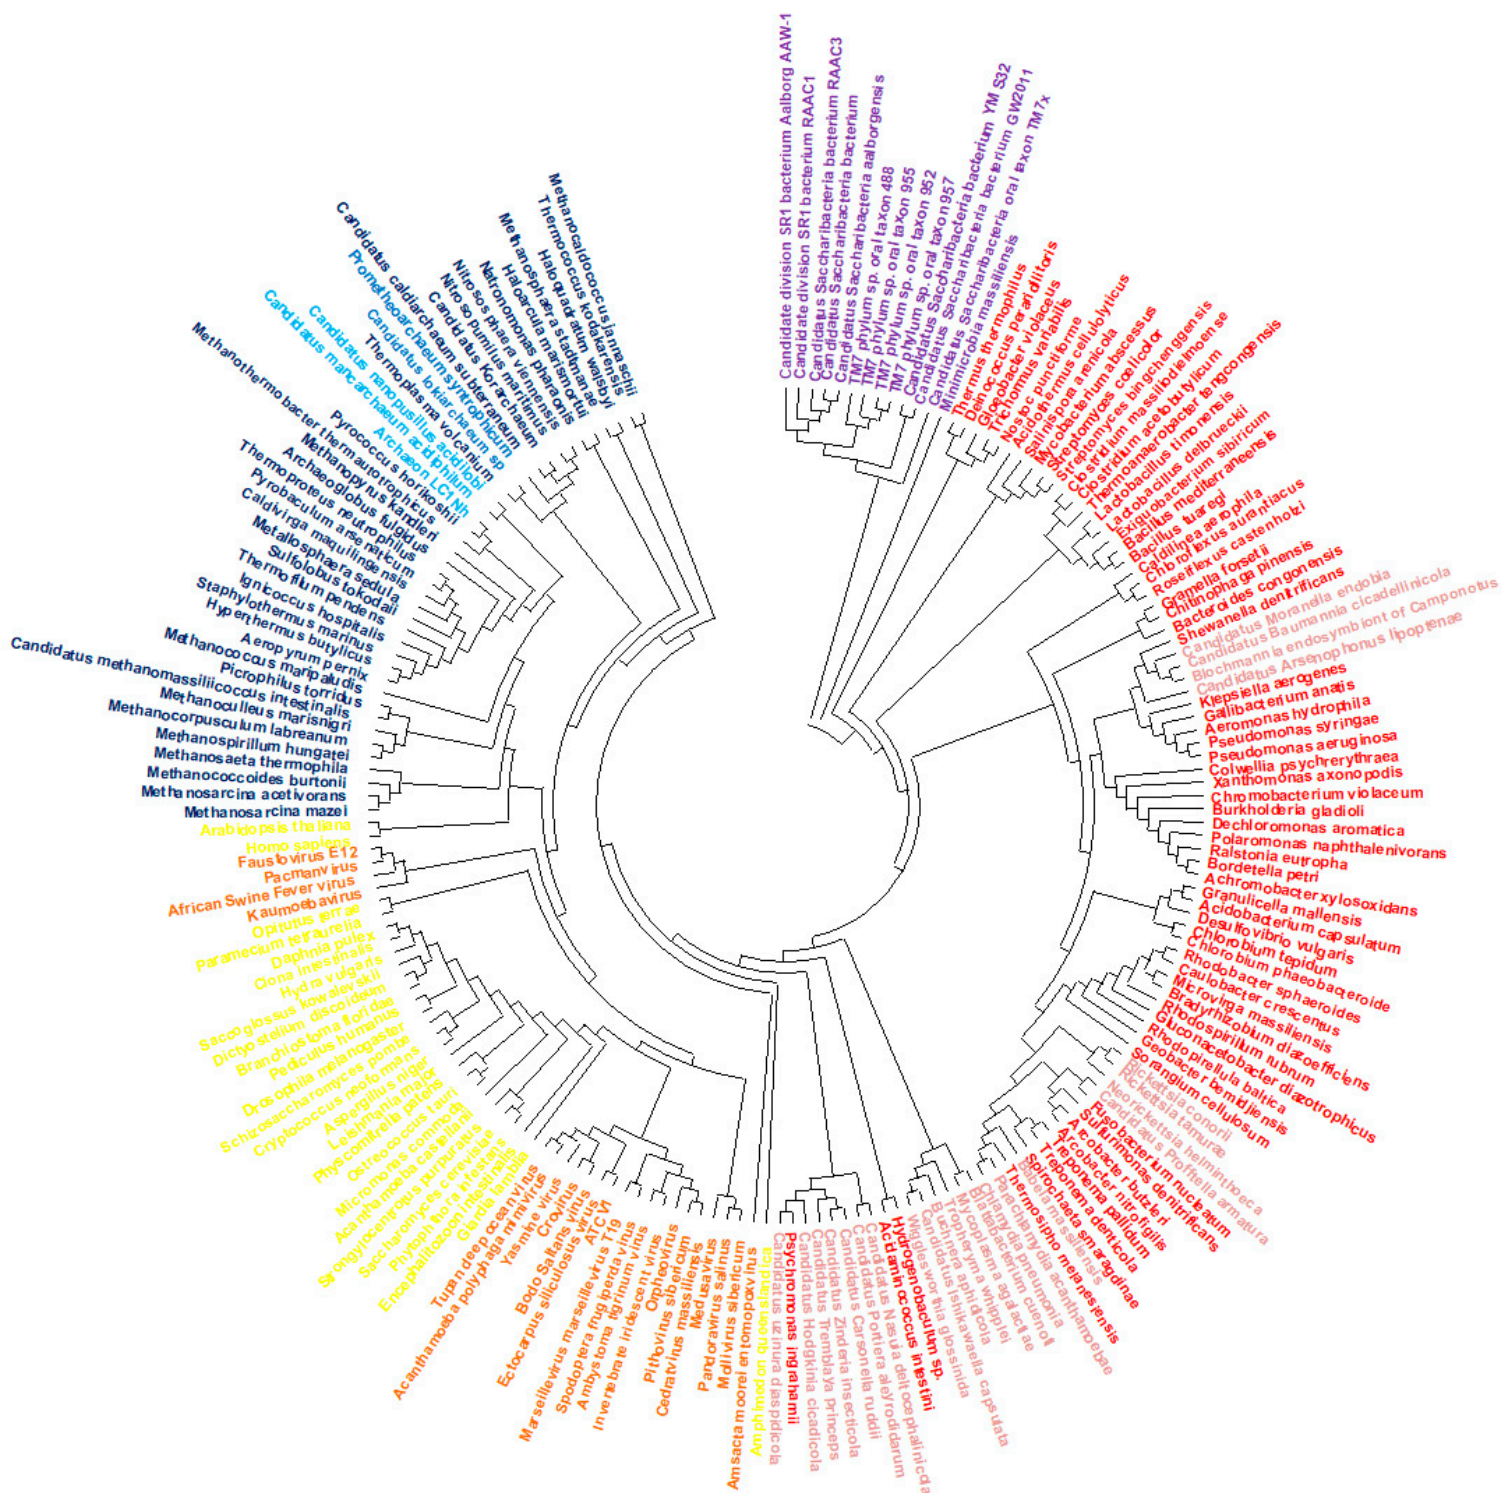

### Figure 6 D: DNA-dependent RNA polymerase subunit II

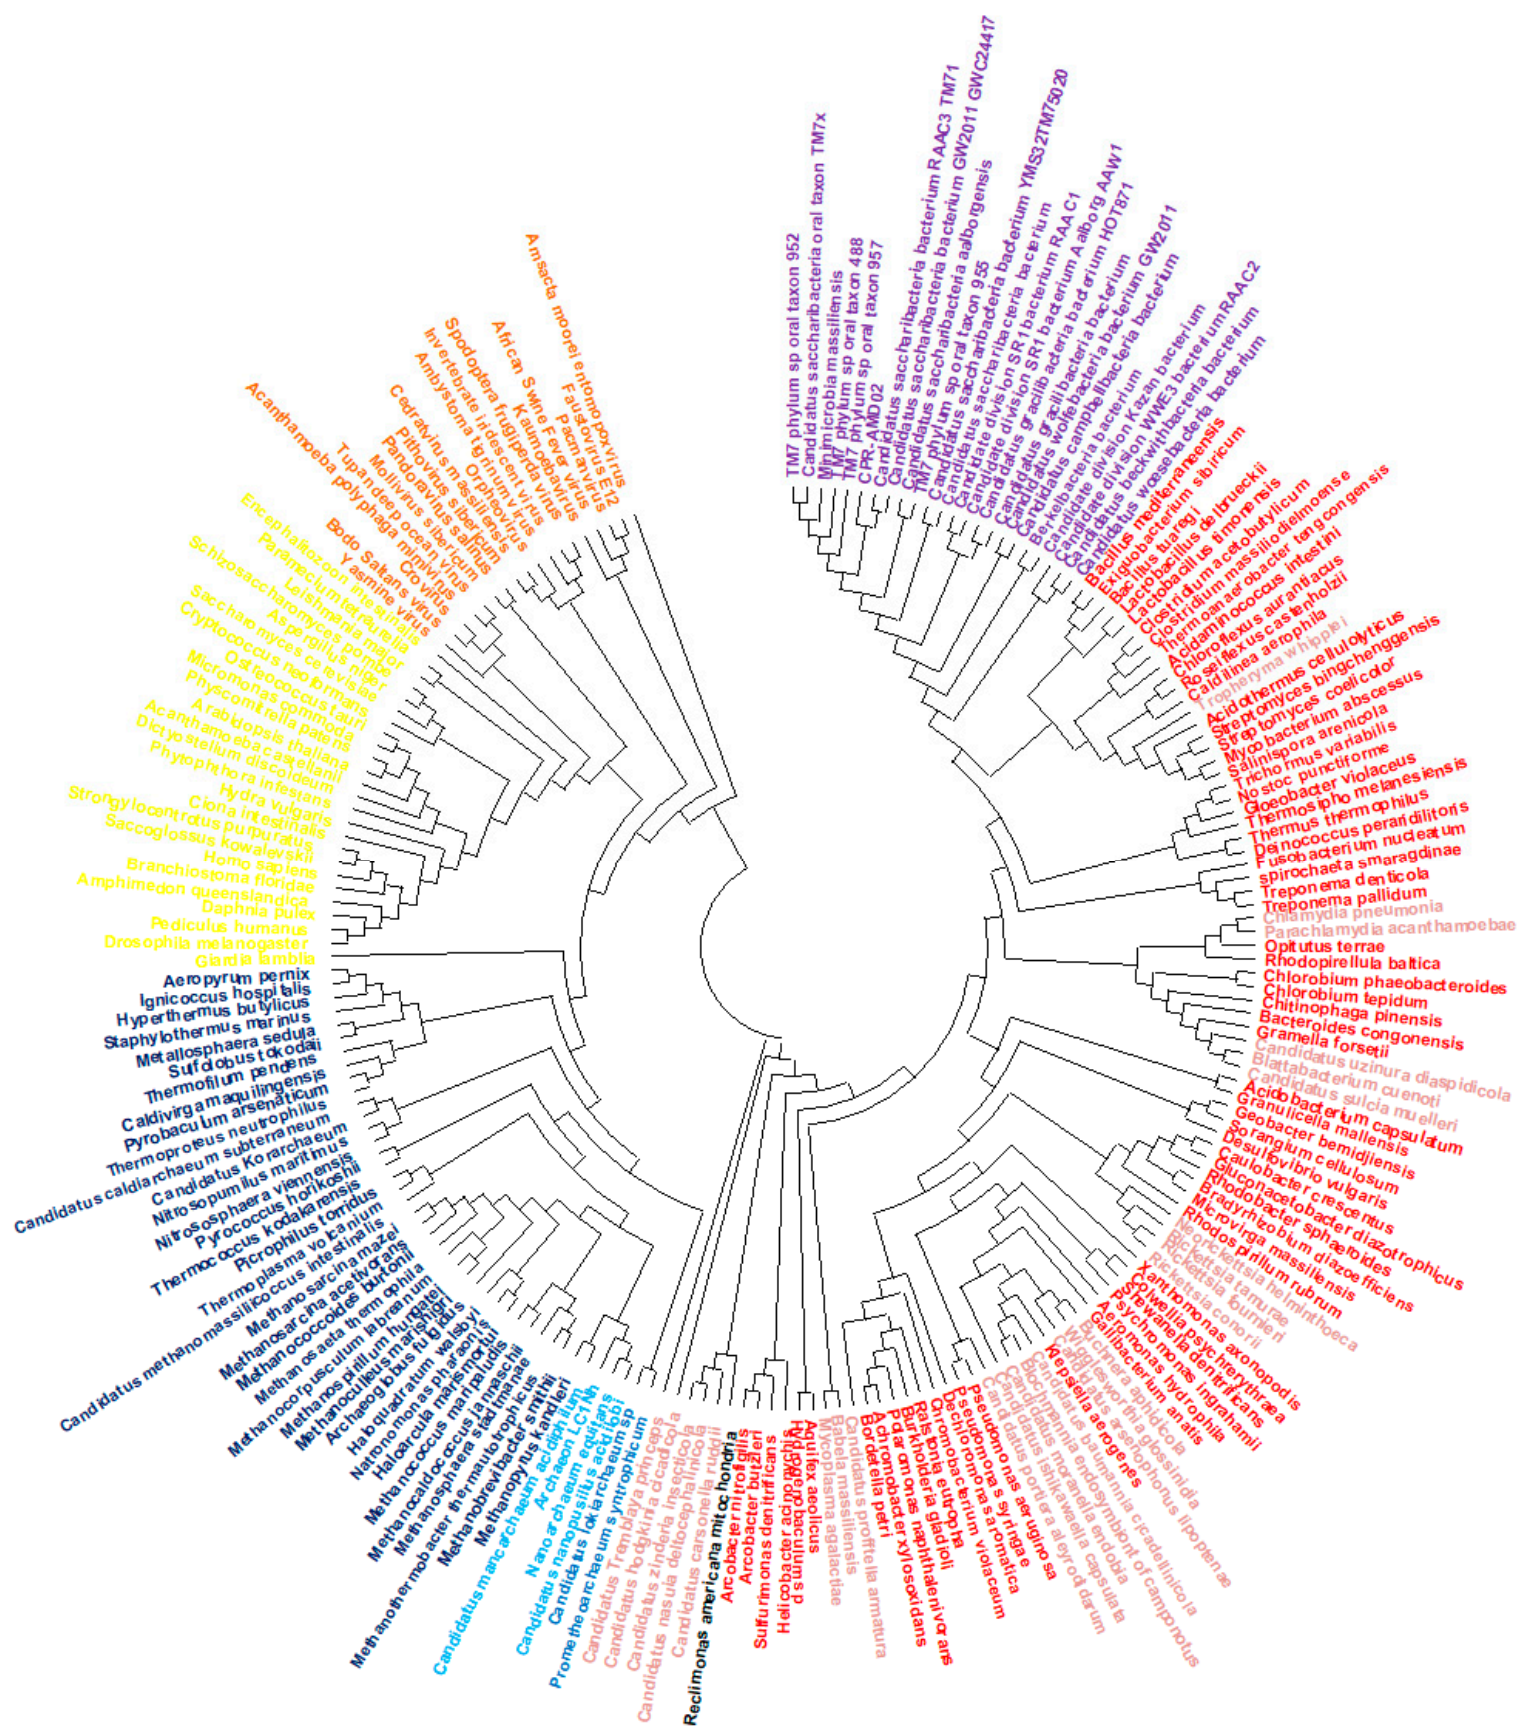





### Figure 6 F: Ribonucleotide reductase

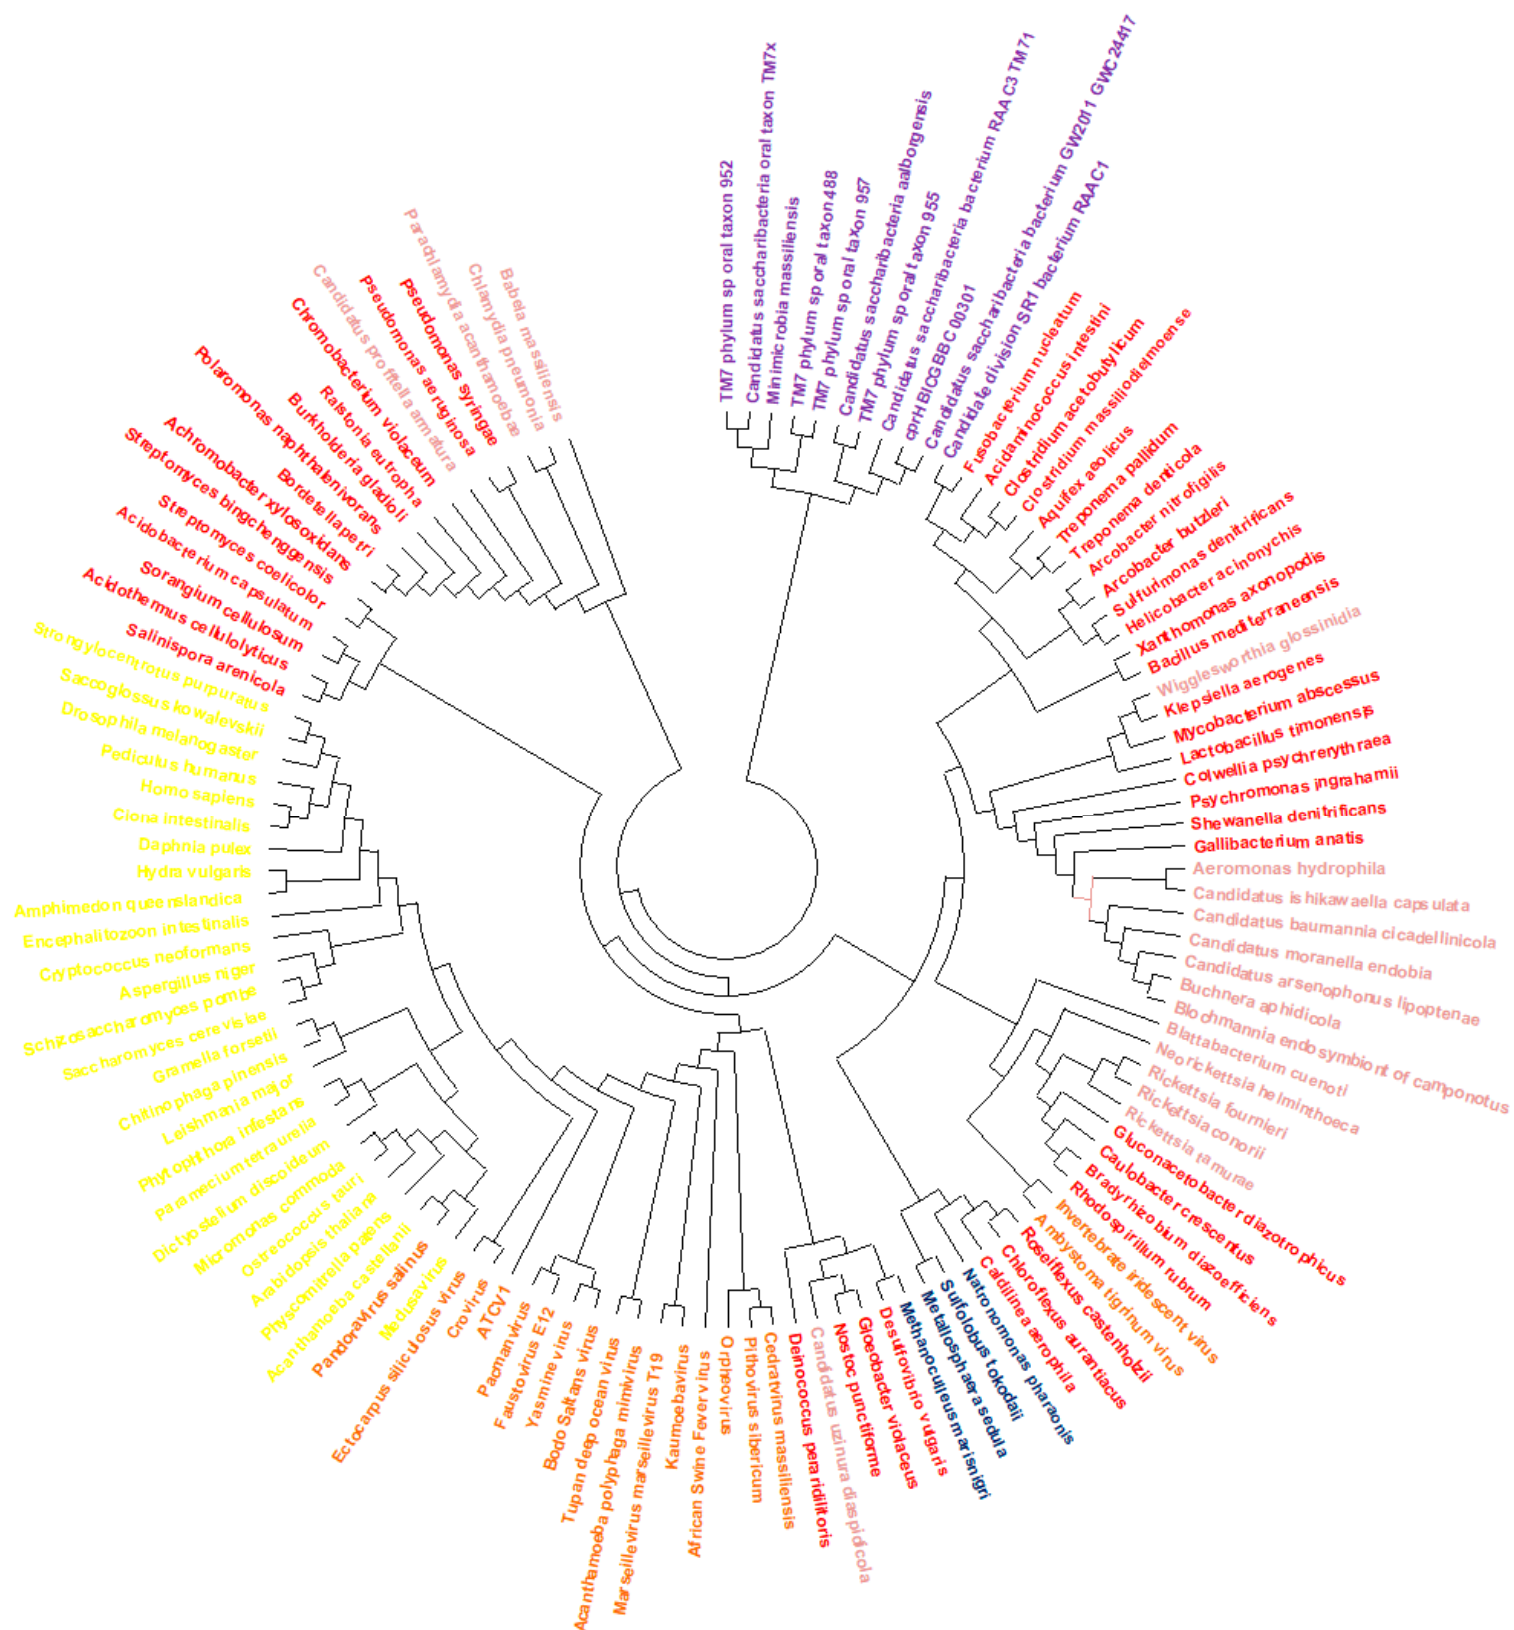

Figure 6 G: Thymidine synthase

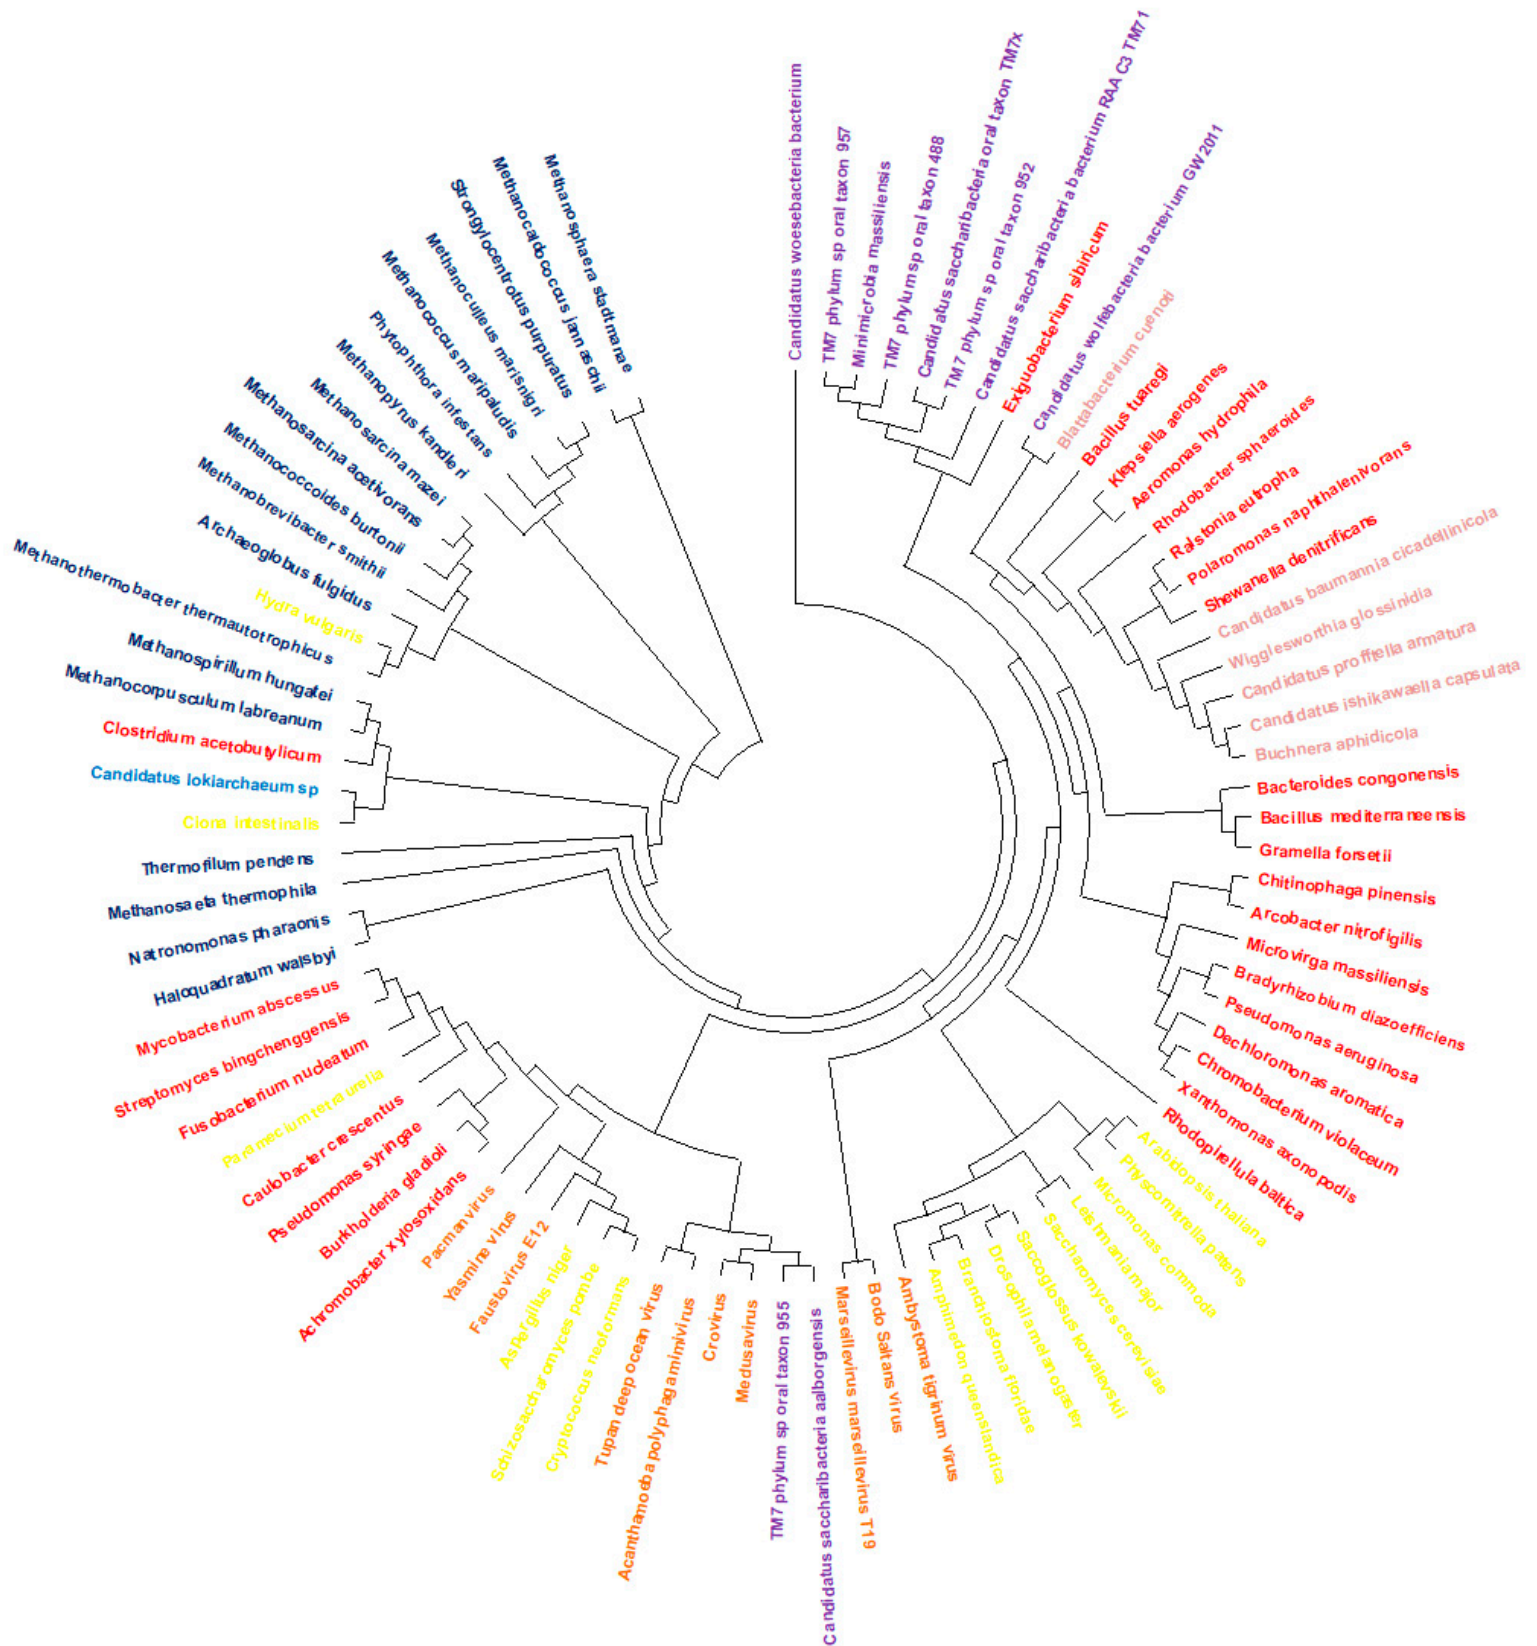



### Figure 6 H: Topoisomerase IIA

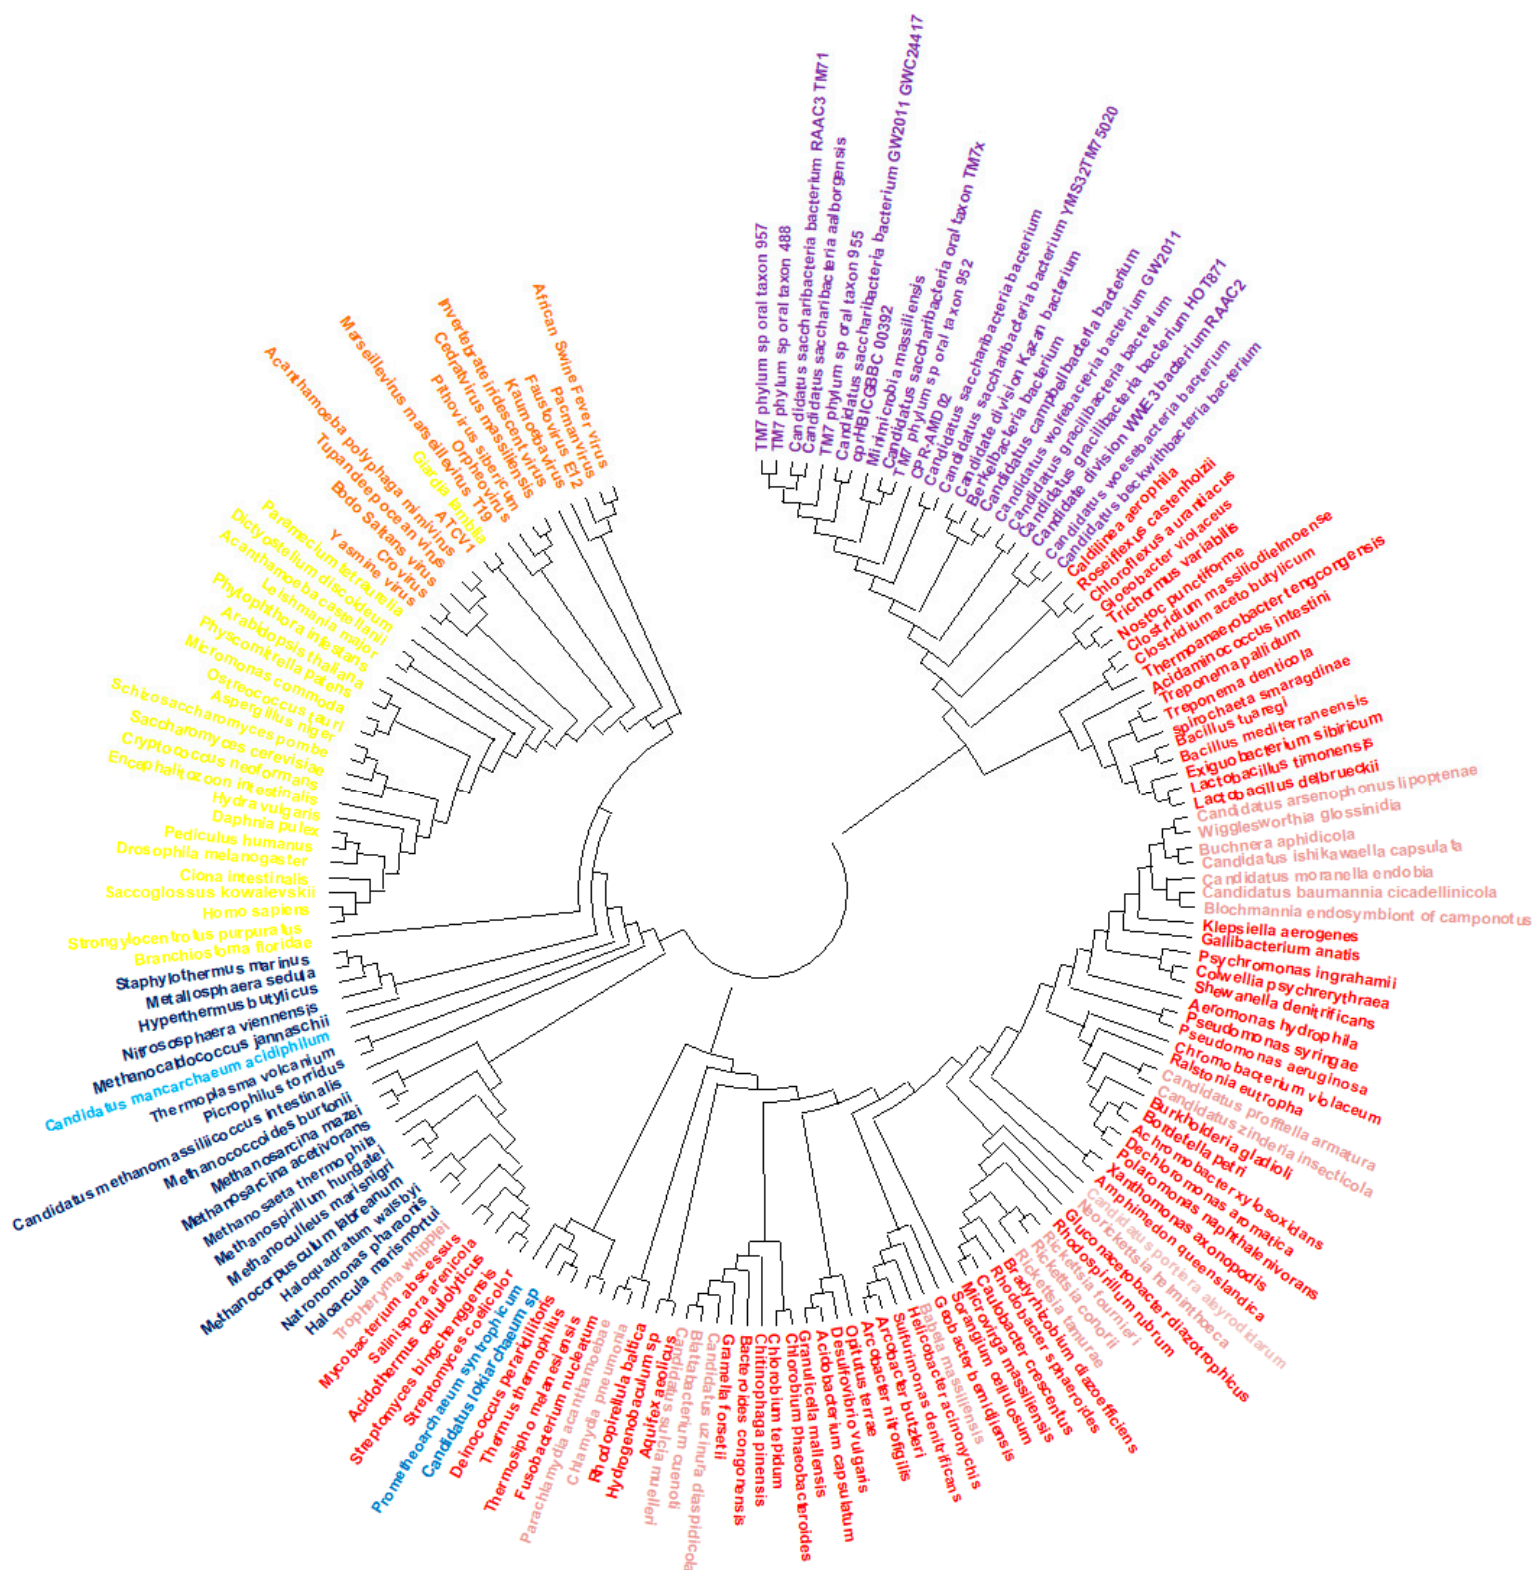



### Figure 6 I: Flap endonuclease I

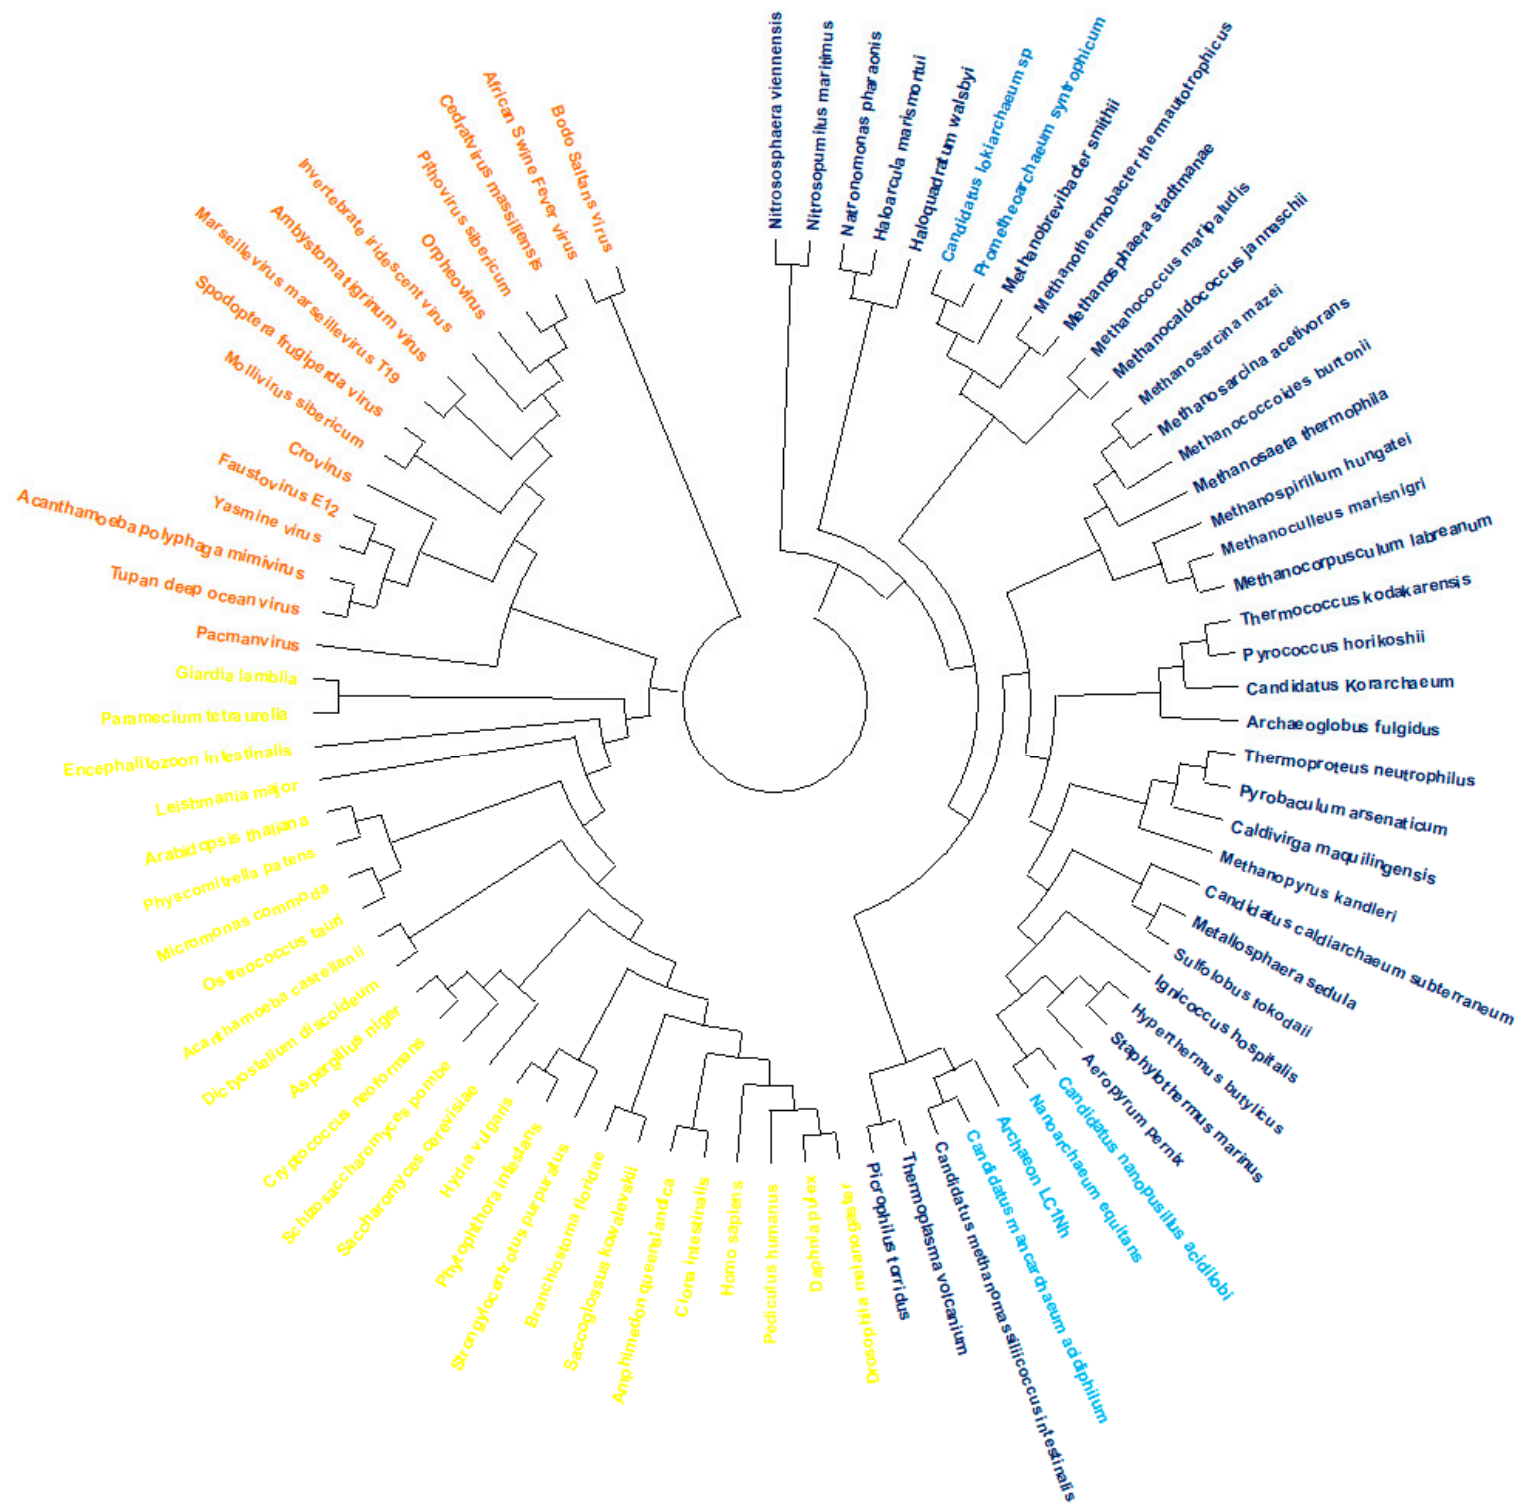

### Figure 6 J: Proliferating Cell Nuclear Antigen

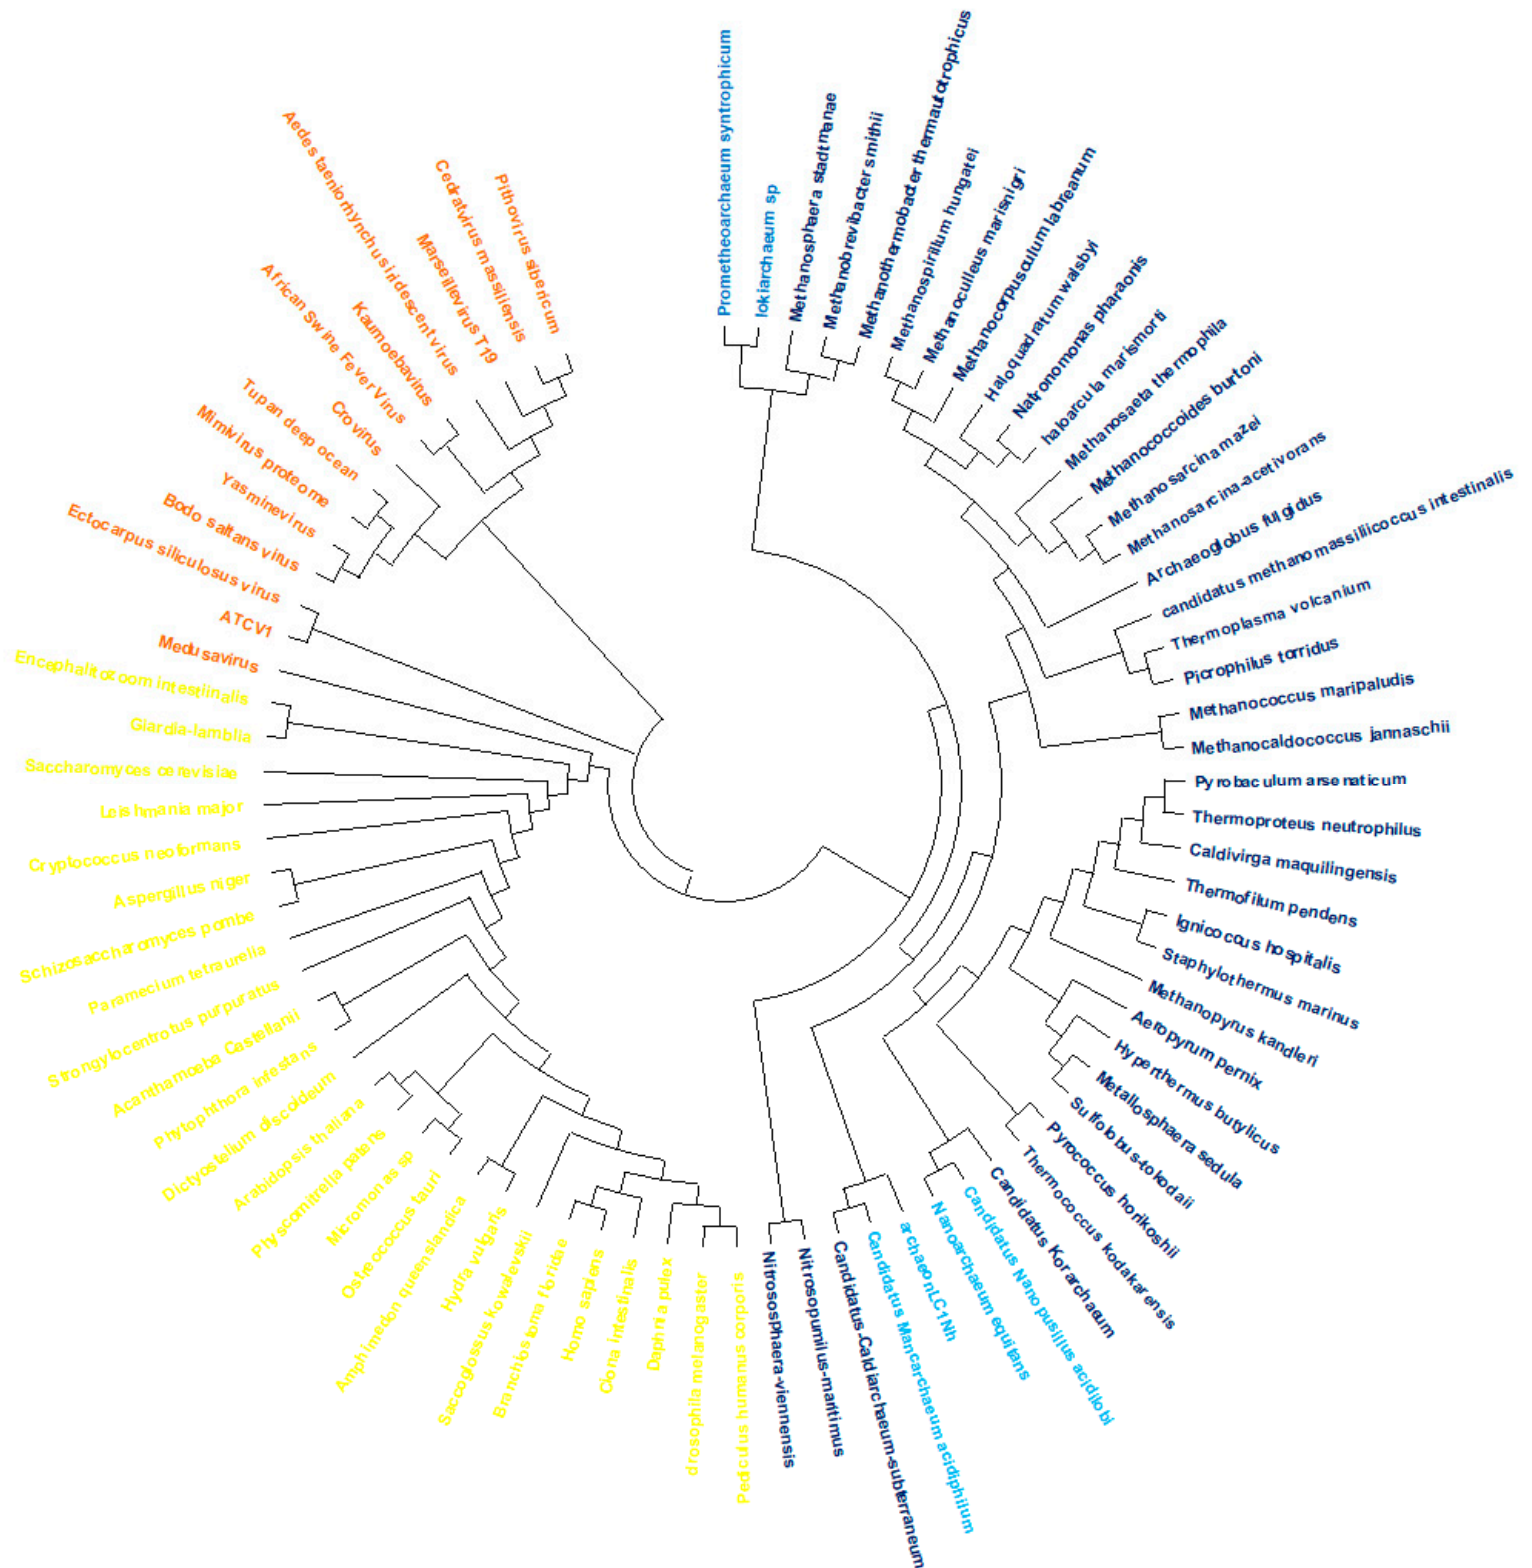

Supplement: s1 [file s1]
