# Supplementary material for: Rhizomal Reclassification of Living Organisms
Source: MDPI journal article supplement (doi:10.3390/ijms22115643), 2021-05-26

Hierarchical clustering by phyletic pattern based on the presence/absence of 180 translational Clusters of Orthologous Groups (COGs) of proteins.

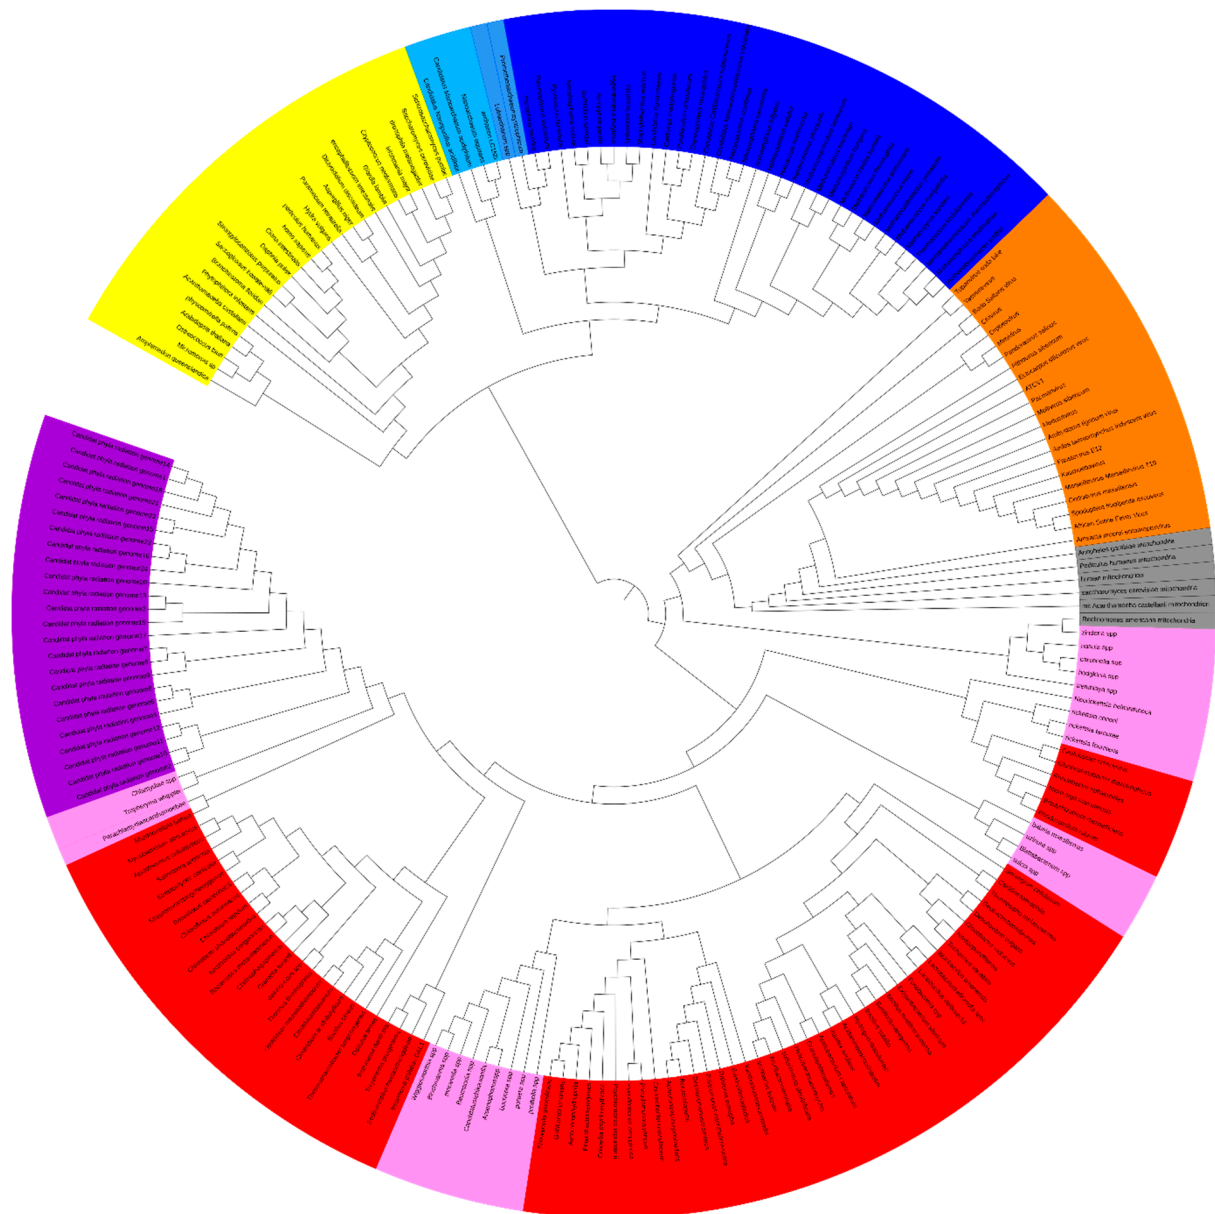

Hierarchical clustering by phyletic pattern based on the presence/absence of 737 informational Clusters of Orthologous Groups (COGs) of proteins

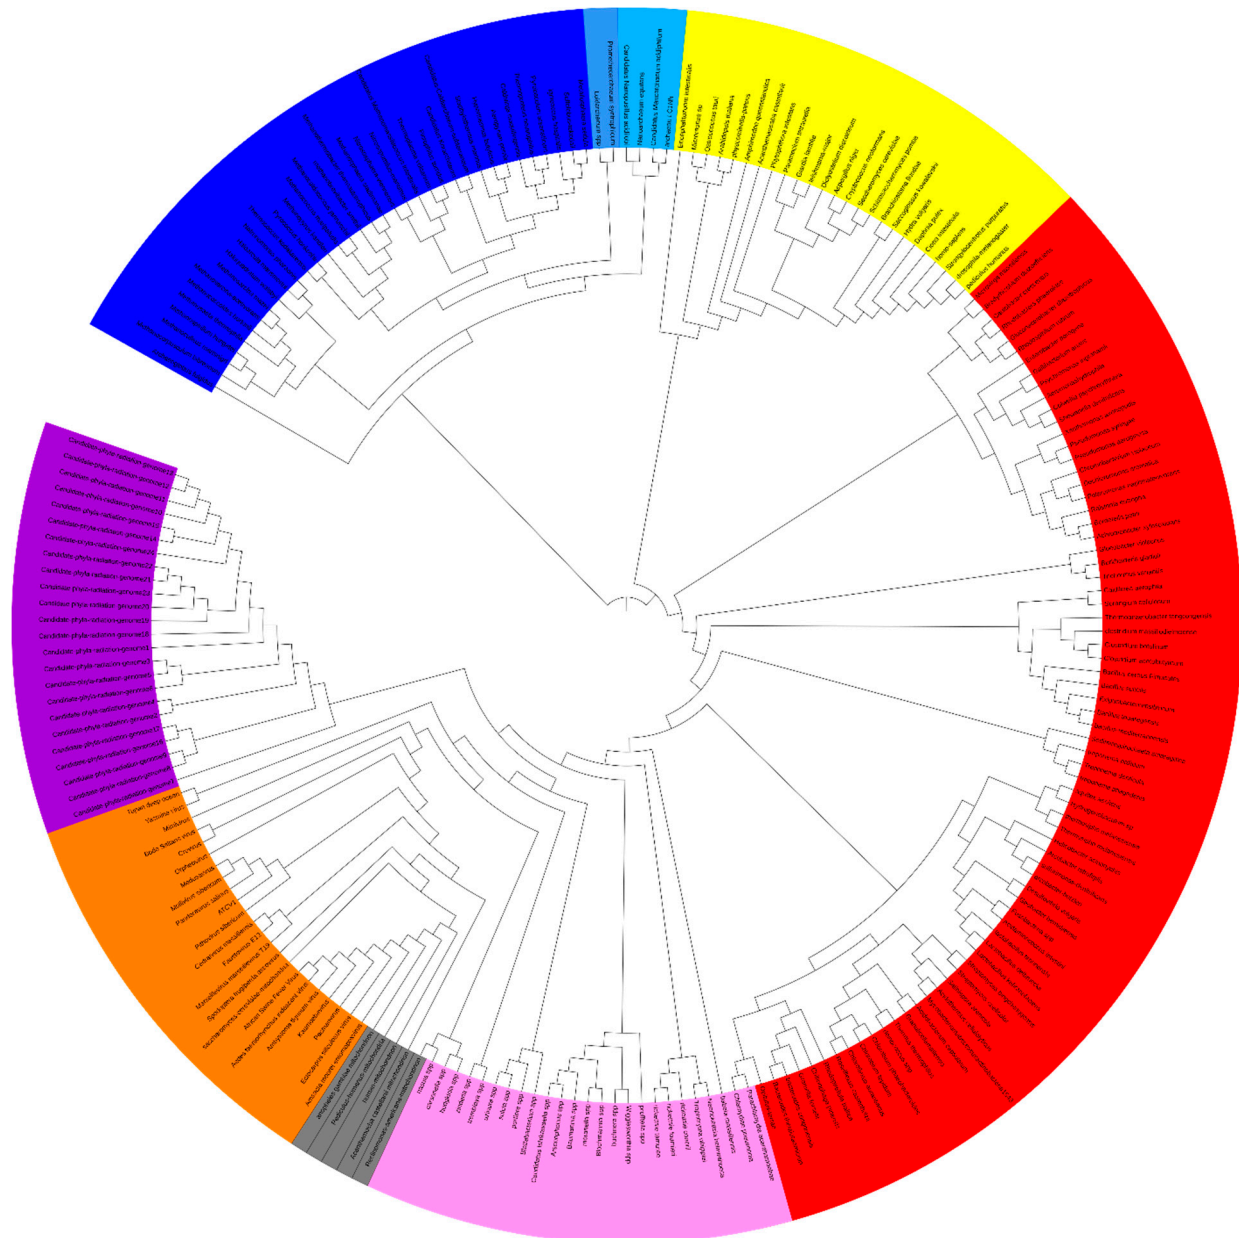

Hierarchical clustering by phyletic pattern based on the presence/absence of 606 fold proteins superfamily.

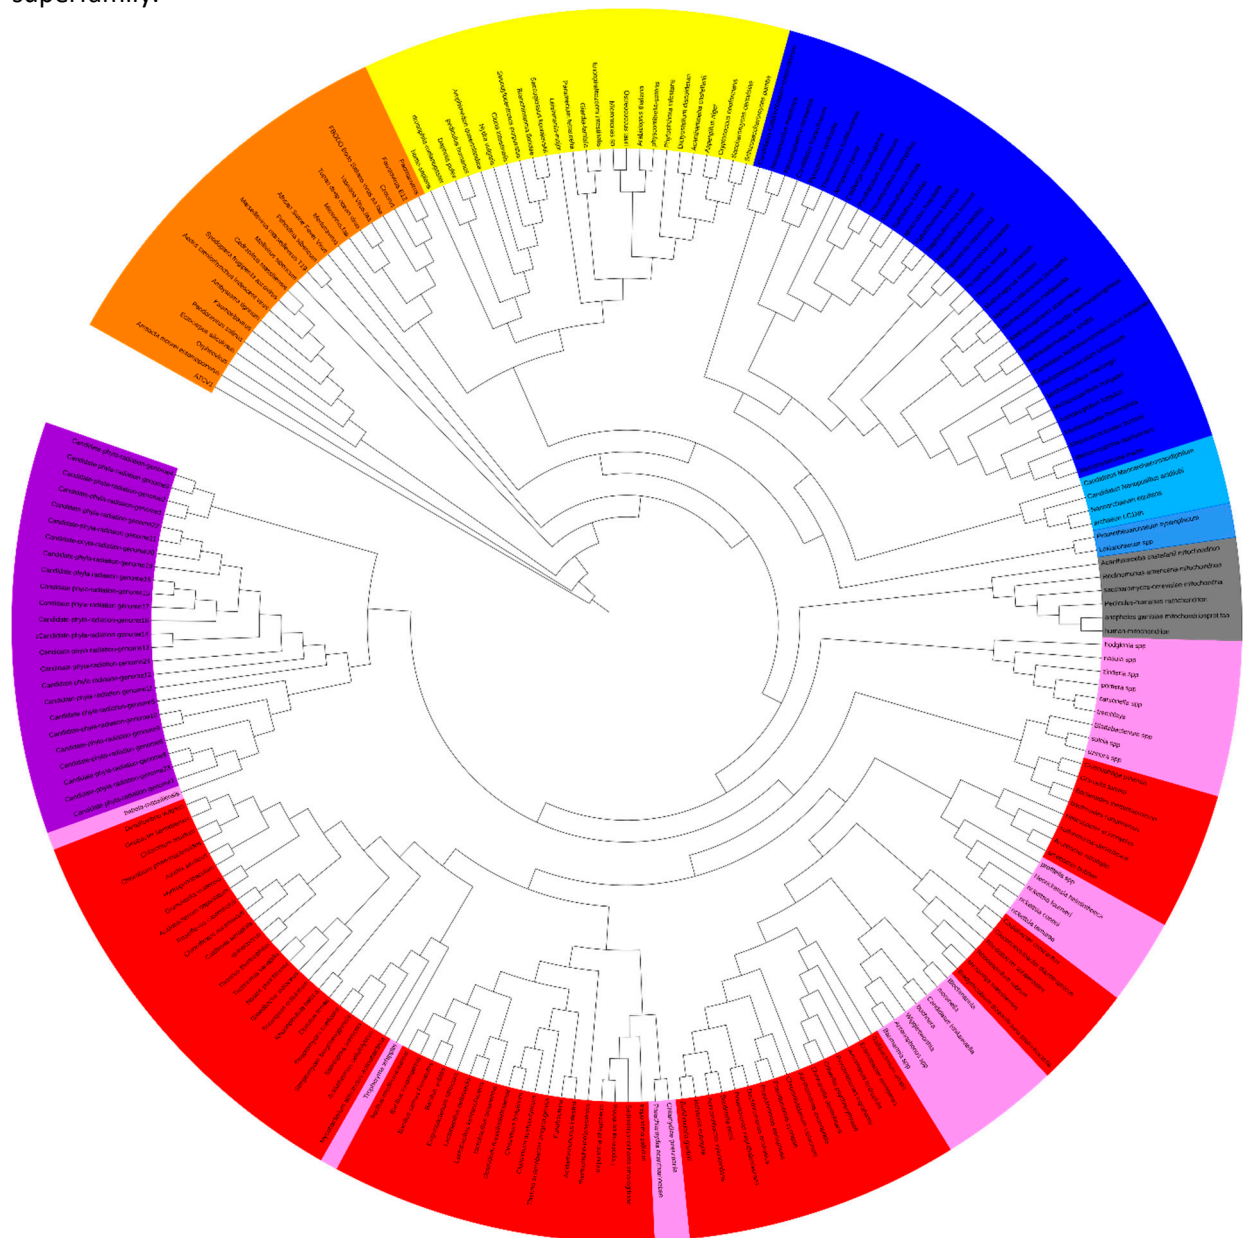

Supplement: s1 [file s1]
