# Supplementary material for: Rhizomal Reclassification of Living Organisms
Source: MDPI journal article supplement (doi:10.3390/ijms22115643), 2021-05-26
Supplement: s1 [file s1]

| TRUC   | Group       | Phylum                   | Accession number |
|--------|-------------|--------------------------|------------------|
| Archae |             | Euryarchaeotes           | AE000782.1       |
|        |             |                          | CP005934.1       |
|        |             |                          | CP039138.1       |
|        |             |                          | FR746099.1       |
|        |             |                          | CP000816.1       |
|        |             |                          | PRJEB30627       |
|        |             |                          | L77117.1         |
|        |             |                          | CP000300.1       |
|        |             |                          | CP000745.1       |
|        |             |                          | CP000559.1       |
|        |             |                          | CP000562.1       |
|        |             |                          | AE009439.1       |
|        |             |                          | CP000477.1       |
|        |             |                          | CP009512.1       |
|        |             |                          | CP000102.1       |
|        |             |                          | CP000254.1       |
|        |             |                          | AE000666.1       |
|        |             |                          | CR936257.1       |
|        |             |                          | AE017261.1       |
|        |             |                          | BA000001.2       |
|        |             |                          | AP006878.1       |
|        |             |                          | BA000011.4       |
|        |             | Crenarchaeotes           | BA000002.3       |
|        |             |                          | CP000852.1       |
|        |             |                          | CP000493.1       |
|        |             |                          | CP000682.1       |
|        |             |                          | AE010299.1       |
|        |             |                          | CP000660.1       |
|        |             |                          | CP000575.1       |
|        |             |                          | BA000023.2       |
|        |             |                          | CP001014.1       |
|        |             | Thaumarchaeotes          | CP000866.1       |
|        |             | CP007536.1               |                  |
|        |             | Candidatus Korarchaeota  | CP000968.1       |
|        |             | Aigarchaeota             | BA000048.1       |
|        |             | Asgard Group             | ASM98684v1       |
|        |             | CP042905.1               |                  |
| Archae | DPANN group | unclassified DPANN group | CP040089.1       |
|        |             | Micrarchaeota            | CP019964.1       |
|        |             | Nanoarchaeota            | CP010514.1       |
|        |             |                          | AE017199.1       |
|        |             |                          |                  |
|        |             |                          | v1.0             |
|        |             |                          | ASM285v2         |

|                           |                    |                         |
|---------------------------|--------------------|-------------------------|
| Eukaryote                 | Opisthokonta       | gb ABEP00000000.2       |
|                           |                    | KH                      |
|                           |                    | ASM9104v1               |
|                           |                    | PA42 4.1                |
|                           |                    | Release 6 plus ISO1 MT  |
|                           |                    | CP001943.1              |
|                           |                    | GRCh38.p13              |
|                           |                    | Hydra_RP_1.0            |
|                           |                    | JCVI_LOUSE_1.0          |
|                           |                    | sacCer3                 |
|                           |                    | Skow_1.1                |
|                           |                    | ASM294v2                |
|                           |                    | Spur_5.0                |
|                           | Viridiplantae      | TAIR10.1                |
|                           |                    | ASM9098v2               |
|                           |                    | version 140606          |
|                           |                    | Phypa V3                |
|                           | Stramenopiles      | ASM14294v1              |
|                           | Alveolata          | ASM16542v1              |
|                           | Amoebozoa          | Acastellanii.strNEFF v1 |
|                           |                    | dicty_2.7               |
|                           | Euglenozoa         | ASM272v1                |
|                           | Metamonada         | UU_WB_2.1               |
|                           |                    |                         |
| Candidate phyla radiation | Kazan              | CP011216.1              |
|                           | Parcubacteria      | CP011209.1              |
|                           |                    | CP011215.1              |
|                           | Microgenomates     | CP011214.1              |
|                           |                    | CP011210.1              |
|                           | Katanobacteria     | CP006914.1              |
|                           | Berkelbacteria     | CP011213.1              |
|                           | Saccharibacteria   | ASM39243v1              |
|                           |                    | ASM351602v1             |
|                           |                    | ASM102969v1             |
|                           |                    | ASM50391v1              |
|                           |                    | ASM295275v1             |
|                           |                    | ASM80362v1              |
|                           |                    | CADDWL00000000          |
|                           |                    | ASM569721v1             |
|                           |                    | ASM1310084v1            |
|                           |                    | ASM1310082v1            |
|                           |                    | ASM569739v1             |
|                           |                    | ASM569705v1             |
|                           |                    | ASM569756v1             |
|                           | Absconditabacteria | CP011268.1              |
|                           |                    | CP006913.1              |
|                           | Crasilibacteria    | CP017714.1              |

|                        |                              |                        |            |
|------------------------|------------------------------|------------------------|------------|
|                        |                              | Gram-negative bacteria | CP042461.1 |
|                        |                              |                        |            |
| Intracellular bacteria | Bacteroidetes/Chlorobi group | Enterobacteria         | CP003263.1 |
|                        |                              |                        | AP013293.1 |
|                        |                              |                        | AP012548.1 |
|                        |                              | Enterobacteria         | AP010872.1 |
|                        |                              |                        | CP010049.1 |
|                        |                              |                        | CP003315.1 |
|                        |                              |                        | CP013920.1 |
|                        |                              |                        | CP002243.1 |
|                        |                              |                        | BA000003.2 |
|                        |                              |                        | CP008985.1 |
|                        |                              | Proteobacteria         | CP003468.1 |
|                        |                              |                        | CP016343.1 |
|                        |                              |                        | CP003543.1 |
|                        |                              |                        | CP008699.1 |
|                        |                              |                        | CP002918.1 |
|                        |                              |                        | CP002161.1 |
|                        |                              |                        | RcoCa1.0   |
|                        |                              |                        | PRJEB23962 |
|                        |                              |                        | AT-1       |
|                        |                              |                        | CP007481.1 |
|                        |                              |                        | CP021173.1 |
|                        |                              | Terrabacteria          | AE014184.1 |
|                        |                              | Chlamydia              | FR872580.1 |
|                        |                              |                        | AE001363.1 |
|                        |                              | Unclassified bacteria  | HG793133.1 |
|                        |                              | Acidobacteria          | CP001472.1 |
|                        |                              |                        | CP003130.1 |
|                        |                              | Aquificiae             | CP001130.1 |
|                        |                              |                        | AE000657.1 |
|                        |                              | Firmicutes             | CP061341.1 |
|                        |                              |                        | CR954253.1 |
|                        |                              |                        | PRJEB20106 |
|                        |                              |                        | CP003058.1 |
|                        |                              |                        | AE008691.1 |
|                        |                              |                        | CP001022.1 |
|                        |                              |                        | PRJEB20368 |
|                        |                              |                        | CP028842.1 |
|                        |                              |                        | AM412317.1 |
|                        |                              |                        | CP001176.1 |
|                        |                              |                        | AL009126.3 |
|                        |                              |                        | PRJEB16343 |
|                        |                              |                        | PRJEB17078 |
|                        |                              | Planctomycetes         | BX294133.1 |
|                        |                              | Deinococcus-thermus    | AP008226.1 |
|                        |                              |                        | CP003382.1 |

|          |                      |                               |            |
|----------|----------------------|-------------------------------|------------|
| Bacteria | Other bacteria phyla | Actinobacteria                | CP000481.1 |
|          |                      |                               | CU458896.1 |
|          |                      |                               | CP000850.1 |
|          |                      |                               | AL939104.1 |
|          |                      |                               | CP002047   |
|          |                      | Bacterioidetes/Chlorobi group | AE006470.1 |
|          |                      |                               | CP000492.1 |
|          |                      |                               | CU207366.1 |
|          |                      |                               | LT598566   |
|          |                      |                               | PRJEB18268 |
|          |                      |                               | CP001699.1 |
|          |                      | Verrucomicrobia               | CP001032.1 |
|          |                      | Thermotogae                   | CP000716.1 |
|          |                      | Chloroflexi                   | CP000909.1 |
|          |                      |                               | AP012337.1 |
|          |                      |                               | CP000804.1 |
|          |                      | Cyanobacteria                 | BA000045.2 |
|          |                      |                               | CP000117.1 |
|          |                      |                               | CP001037.1 |
|          |                      | Proteobacteria                | CP000153.1 |
|          |                      |                               | CP000361.1 |
|          |                      |                               | CP002667.1 |
|          |                      |                               | AM260522.1 |
|          |                      |                               | CP001999.1 |
|          |                      |                               | AE017285.1 |
|          |                      |                               | CP001189.1 |
|          |                      |                               | CP001340.1 |
|          |                      |                               | CP000230.1 |
|          |                      |                               | CP000089.1 |
|          |                      |                               | CP000302.1 |
|          |                      |                               | CP000510.1 |
|          |                      |                               | CP000143.2 |
|          |                      |                               | CP001124.1 |
|          |                      |                               | CP000462.1 |
|          |                      |                               | AE016825.1 |
|          |                      |                               | AM902716.1 |
|          |                      |                               | CP002824.1 |
|          |                      |                               | CP004399.1 |
|          |                      |                               | CP000529.1 |
|          |                      |                               | CP000083.1 |
|          |                      |                               | AE016853.1 |
|          |                      |                               | AE004091.2 |
|          |                      |                               | CP002287.1 |
|          |                      |                               | CP002877.1 |
|          |                      |                               | CP002599.1 |
|          |                      |                               | JC 119     |
|          |                      |                               | BA000040.2 |

|               |                                          |                            |            |
|---------------|------------------------------------------|----------------------------|------------|
|               |                                          |                            | AM746676.1 |
|               |                                          | Spirochaetes               | CP002116.1 |
|               |                                          |                            | CP003115.1 |
|               |                                          |                            | CP042818.1 |
|               |                                          |                            | PRJEB27762 |
|               |                                          | Fusobacteria               | AE009951.2 |
|               |                                          |                            |            |
| Giant viruses | Ascoviridae                              | NC_008361.1                |            |
|               | Asfarvirus                               | AM712239                   |            |
|               | Iridoviridae                             | NC_005832.1                |            |
|               |                                          | NC_008187.1                |            |
|               | Marseilleviridae                         | ViralProj43573             |            |
|               | Mimiviridae                              | MF782455.1                 |            |
|               |                                          | ViralProj59783             |            |
|               |                                          | ViralProj60053             |            |
|               |                                          | ASM296648v1                |            |
|               |                                          | PSH01000001.1, UPSH0100000 |            |
|               | Phycodnaviridae                          | NC_008724.1                |            |
|               |                                          | NC_002687.1                |            |
|               |                                          | LT906555.1                 |            |
|               | Pithoviridae                             | NC_032108.1                |            |
|               |                                          | NC_023423.1                |            |
|               | Poxviridae                               | NC_002520.1                |            |
|               | Unclassified viruses                     | KJ614390.1                 |            |
|               |                                          | MW018138.1                 |            |
|               |                                          | KC977571                   |            |
|               |                                          | NC_027867.1                |            |
|               |                                          | NC_034249.1                |            |
|               |                                          | LT706986.1                 |            |
|               |                                          |                            |            |
| Mitochondria  | NC_012920.1                              |                            |            |
|               | NC_001823.1                              |                            |            |
|               | NC_027264.1                              |                            |            |
|               | NC_002084.1                              |                            |            |
|               | NC_001637.1                              |                            |            |
|               | FJ499473–FJ499490 ,<br>FJ514591–FJ514599 |                            |            |
|               | NC_008290.1                              |                            |            |
|               |                                          |                            |            |
| Chloroplast   | NC_008289.1                              |                            |            |
|               | NC_012575.1                              |                            |            |

| Species                                              | Genome size (Kb) | Number of coding genes | Number of COGs | Number of COG - J |
|------------------------------------------------------|------------------|------------------------|----------------|-------------------|
| <i>Archaeoglobus fulgidus</i>                        | 2,178,400        | 2407                   | 286            | 123               |
| <i>Candidatus Methanomassiliicoccus intestinalis</i> | 1,931,651        | 1826                   | 177            | 92                |
| <i>Haloarcula marismouti</i>                         | 4,184,924        | 3142                   | 187            | 89                |
| <i>Haloquadratum walsbyi</i>                         | 3,260,476        | 2907                   | 184            | 86                |
| <i>Ignicoccus hospitalis</i>                         | 1,297,538        | 1434                   | 169            | 86                |
| <i>Methanobrevibacter smithii</i>                    | 1,853,160        | 1605                   | 191            | 91                |
| <i>Methanocaldococcus jannaschii</i>                 | 1,739,927        | 1715                   | 190            | 91                |
| <i>Methanococcoides burtonii</i>                     | 2,575,032        | 2272                   | 196            | 88                |
| <i>Methanococcus maripaludis</i>                     | 1,772,694        | 1788                   | 198            | 95                |
| <i>Methanocorpusculum labreanum</i>                  | 1,804,962        | 1739                   | 179            | 91                |
| <i>Methanoculleus marisnigri</i>                     | 2,478,101        | 2489                   | 205            | 96                |
| <i>Methanopyrus kandleri</i>                         | 1,694,969        | 1691                   | 181            | 98                |
| <i>Methanosaeta thermophila</i>                      | 1,879,471        | 1696                   | 199            | 97                |
| <i>Methanosarcina mazei</i>                          | 4,142,816        | 3347                   | 210            | 105               |
| <i>Methanosphaera stadtmanae</i>                     | 1,767,403        | 1534                   | 187            | 96                |
| <i>Methanospirillum hungatei</i>                     | 3,544,738        | 3139                   | 203            | 94                |
| <i>Methanothermobacter thermautotrophicus</i>        | 1,751,377        | 1869                   | 186            | 95                |
| <i>Natronomonas pharaonis</i>                        | 2,749,696        | 2694                   | 185            | 87                |
| <i>Picrophilus torridus</i>                          | 1,545,895        | 1535                   | 159            | 89                |
| <i>Pyrococcus horikoshii</i>                         | 1,738,505        | 2061                   | 174            | 84                |
| <i>Thermococcus kodakarensis</i>                     | 2,088,737        | 2306                   | 201            | 94                |
| <i>Thermoplasma volcanium</i>                        | 1,584,804        | 1526                   | 159            | 86                |
| <i>Aeropyrum pernix</i>                              | 1,669,696        | 1700                   | 171            | 92                |
| <i>Caldivirga maquilingensis</i>                     | 2,077,567        | 1963                   | 159            | 79                |
| <i>Hyperthermus butylicus</i>                        | 1,667,163        | 1602                   | 163            | 90                |
| <i>Metallosphaera sedula</i>                         | 2,191,517        | 2256                   | 169            | 84                |
| <i>Methanosarcina acetivorans</i>                    | 5,751,492        | 4540                   | 209            | 106               |
| <i>Pyrobaculum arsenaticum</i>                       | 2,121,076        | 2298                   | 168            | 84                |
| <i>Staphylothermus marinus</i>                       | 1,570,485        | 1570                   | 167            | 86                |
| <i>Sulfolobus tokodaii</i>                           | 2,694,756        | 2816                   | 169            | 83                |
| <i>Thermoproteus neutrophilus</i>                    | 1,769,823        | 1966                   | 173            | 89                |
| <i>Nitrosopumilus maritimus</i>                      | 1,645,259        | 1795                   | 162            | 83                |
| <i>Nitrososphaera viennensi</i>                      | 2,527,938        | 3123                   | 172            | 88                |
| <i>Candidatus Korarchaeum cryptofilum</i>            | 1,590,757        | 1602                   | 156            | 84                |
| <i>Candidatus Caldiarchaeum subterraneum</i>         | 1,680,938        | 1742                   | 143            | 79                |
| <i>Lokiarchaeum sp.</i>                              | 5,143,417        | 5384                   | 157            | 87                |
| <i>Prometheoarchaeum syntrophicum</i>                | 4,427,796        | 3944                   | 164            | 79                |
| <i>Archaeon LCINh</i>                                | 973,463          | 1162                   | 126            | 77                |
| <i>Mancarchaeum acidiphilum</i>                      | 952,257          | 952                    | 116            | 65                |
| <i>Nanopusillus acidilobi</i>                        | 605,887          | 587                    | 96             | 51                |
| <i>Nanoarchaeum equitans</i>                         | 490,885          | 536                    | 113            | 71                |
|                                                      |                  |                        |                |                   |
| <i>Amphimedon queenslandica</i>                      | 166,699,561      | 9827                   | 127            | 63                |
| <i>Aspergillus niger</i>                             | 34,006,671       | 10609                  | 115            | 57                |

|                                                                |               |       |     |    |
|----------------------------------------------------------------|---------------|-------|-----|----|
| <i>Branchiostoma floridae</i>                                  | 521,895,125   | 28623 | 107 | 54 |
| <i>Ciona intestinalis</i>                                      | 115,227,301   | 14096 | 107 | 55 |
| <i>Cryptococcus neoformans</i>                                 | 19,051,922    | 6475  | 105 | 54 |
| <i>Daphnia pulex</i>                                           | 189,550,516   | 30611 | 114 | 57 |
| <i>Drosophila melanogaster</i>                                 | 143,726,002   | 27755 | 108 | 58 |
| <i>Encephalitozoon intestinalis</i>                            | 2,216,898     | 1799  | 147 | 54 |
| <i>Homo sapiens</i>                                            | 3,099,706,404 | 71338 | 124 | 60 |
| <i>Hydra vulgaris</i>                                          | 852,170,992   | 17002 | 104 | 54 |
| <i>Pediculus humanus</i>                                       | 110,781,312   | 10775 | 98  | 54 |
| <i>Saccharomyces cerevisiae</i>                                | 12,157,105    | 5906  | 110 | 55 |
| <i>Saccoglossus kowalevskii</i>                                | 775,840,395   | 22111 | 101 | 54 |
| <i>Schizosaccharomyces pombe</i>                               | 12,591,251    | 5133  | 113 | 57 |
| <i>Strongylocentrotus purpuratus</i>                           | 921,855,793   | 22709 | 109 | 55 |
| <i>Arabidopsis thaliana</i>                                    | 119,668,634   | 35176 | 151 | 72 |
| <i>Micromonas commoda</i>                                      | 21,109,336    | 10140 | 149 | 75 |
| <i>Ostreococcus tauri</i>                                      | 13,032,761    | 7662  | 137 | 74 |
| <i>Physcomitrella patens</i>                                   | 472,081,022   | 35936 | 158 | 84 |
| <i>Phytophthora infestans</i>                                  | 228,543,505   | 17797 | 116 | 58 |
| <i>Paramecium tetraurelia</i>                                  | 72,094,543    | 39642 | 103 | 59 |
| <i>Acanthamoeba castellanii</i>                                | 42,019,824    | 14974 | 105 | 56 |
| <i>Dictyostelium discoideum</i>                                | 34,204,973    | 13191 | 108 | 60 |
| <i>Leishmania major</i>                                        | 32,855,089    | 8265  | 79  | 48 |
| <i>Giardia intestinalis</i>                                    | 12,078,186    | 7364  | 74  | 48 |
|                                                                |               |       |     |    |
| <i>Candidate division Kazan bacterium</i>                      | 602,646       | 591   | 66  | 36 |
| <i>Candidatus Wolfebacteria bacterium GW2011</i>               | 984,447       | 1022  | 52  | 31 |
| <i>Candidatus Campbellbacteria bacterium</i>                   | 752,630       | 739   | 53  | 30 |
| <i>Candidatus woesebacteria bacterium</i>                      | 819,458       | 909   | 62  | 35 |
| <i>Candidatus Beckwithbacteria bacterium</i>                   | 1,049,888     | 1113  | 66  | 35 |
| <i>Candidate division WWE3 bacterium RAAC2</i>                 | 878,109       | 871   | 54  | 28 |
| <i>Berkelbacteria bacterium</i>                                | 915,059       | 992   | 64  | 32 |
| <i>Candidatus Saccharibacteria aalborgensis</i>                | 1,013,781     | 1,048 | 65  | 33 |
| <i>Candidatus Saccharibacteria bacterium</i>                   | 1,005,782     | 1,089 | 69  | 32 |
| <i>Candidatus Saccharibacteria bacterium GW2011_GWC2_44_17</i> | 1,038,683     | 1,052 | 67  | 32 |
| <i>Candidatus Saccharibacteria bacterium RAAC3_TM7_1</i>       | 845,464       | 717   | 62  | 26 |
| <i>Candidatus Saccharibacteria bacterium YM_S32_TM7_50_20</i>  | 1,450,269     | 1,524 | 64  | 28 |
| <i>Candidatus Saccharibacteria oral taxon TM7x</i>             | 705,138       | 633   | 66  | 32 |
| <i>Candidatus Minimicrobia massiliensis</i>                    | 948,334       | 935   | 64  | 31 |
| <i>TM7 phylum sp. oral taxon 488 AC001</i>                     | 889,964       | 913   | 66  | 31 |
| <i>TM7 phylum sp. oral taxon 488 AC002</i>                     | 847,999       | 851   | 67  | 32 |
| <i>TM7 phylum sp. oral taxon 488 CM006</i>                     | 893,660       | 915   | 66  | 32 |
| <i>TM7 phylum sp. oral taxon 952</i>                           | 705,178       | 776   | 66  | 31 |
| <i>TM7 phylum sp. oral taxon 955</i>                           | 842,202       | 916   | 66  | 33 |
| <i>TM7 phylum sp. oral taxon 957</i>                           | 782,344       | 711   | 67  | 32 |
| <i>Candidate division SR1 bacterium Aalborg AAW-1</i>          | 1,044,756     | 993   | 54  | 31 |
| <i>Candidate division SR1 bacterium RAAC1</i>                  | 1,177,760     | 1059  | 60  | 36 |
| <i>Candidatus Gracilibacteria bacterium HOT-871</i>            | 1,184,529     | 1112  | 66  | 37 |

|                                               |           |       |     |    |
|-----------------------------------------------|-----------|-------|-----|----|
| <i>Candidatus gracilibacteria bacterium</i>   | 1,343,103 | 1,196 | 70  | 36 |
|                                               |           |       |     |    |
| <i>Candidatus uzinura diaspidicola</i>        | 263,431   | 227   | 39  | 29 |
| <i>Candidatus Sulcia muelleri</i>             | 285,352   | 251   | 34  | 25 |
| <i>Blattabacterium cuenoti</i>                | 632,490   | 584   | 60  | 37 |
| <i>Candidatus Ishikawaella capsulata</i>      | 754,729   | 614   | 79  | 36 |
| <i>Blochmannia endosymbiont of Camponotus</i> | 773,940   | 584   | 69  | 41 |
| <i>Wigglesworthia glossinidia</i>             | 719,535   | 635   | 68  | 39 |
| <i>Candidatus Arsenophonus lipoptenae</i>     | 836,724   | 625   | 73  | 38 |
| <i>Candidatus Moranella endobia</i>           | 538,294   | 406   | 70  | 43 |
| <i>Buchnera aphidicola</i>                    | 655,725   | 564   | 69  | 38 |
| <i>Candidatus Baumannia cicadellinicola</i>   | 759,425   | 689   | 79  | 40 |
| <i>Candidatus Profftella armatura</i>         | 464,857   | 366   | 60  | 38 |
| <i>Candidatus Portiera aleyrodidarum</i>      | 359,359   | 267   | 36  | 27 |
| <i>Candidatus Carsonella ruddii</i>           | 174,017   | 192   | 8   | 7  |
| <i>Candidatus Hodgkinia cicadicola</i>        | 150,297   | 170   | 4   | 4  |
| <i>Candidatus Tremblaya princeps</i>          | 138,931   | 116   | 15  | 12 |
| <i>Candidatus Zinderia insecticola</i>        | 208,564   | 206   | 15  | 12 |
| <i>Rickettsia conorii</i>                     | 1,260,331 | 1,136 | 80  | 42 |
| <i>Rickettsia fournieri</i>                   | 1,447,740 | 1,282 | 91  | 45 |
| <i>Rickettsia tamurae</i>                     | 1,453,216 | 1,295 | 91  | 45 |
| <i>Neorickettsia helminthoeca</i>             | 884,232   | 868   | 75  | 39 |
| <i>Candidatus Nasuia deltocephalinicola</i>   | 144,602   | 159   | 7   | 4  |
| <i>Tropheryma whipplei</i>                    | 927,303   | 808   | 82  | 39 |
| <i>Parachlamydia acanthamoebae</i>            | 3,072,383 | 2788  | 95  | 45 |
| <i>Chlamydia pneumonia</i>                    | 1,230,230 | 1052  | 73  | 38 |
| <i>Candidatus Babela massiliensis (TM6)</i>   | 1,118,422 | 981   | 66  | 35 |
| <i>Acidobacterium capsulatum</i>              | 4,127,356 | 3382  | 120 | 45 |
| <i>Granulicella mallensis</i>                 | 6,237,577 | 4815  | 123 | 44 |
| <i>Hydrogenobaculum sp.</i>                   | 1,516,013 | 1629  | 90  | 42 |
| <i>Aquifex aeolicus</i>                       | 1,590,791 | 1522  | 104 | 42 |
| <i>Lactobacillus kefiranofaciens</i>          | 2,173,634 | 2026  | 111 | 47 |
| <i>Lactobacillus delbrueckii</i>              | 1,864,998 | 2096  | 107 | 43 |
| <i>Lactobacillus timonensis</i>               | 1,678,325 | 1,527 | 110 | 45 |
| <i>Acidaminococcus intestini</i>              | 2,487,765 | 2404  | 108 | 43 |
| <i>Thermoanaerobacter tengcongensis</i>       | 2,689,445 | 2588  | 118 | 41 |
| <i>Exiguobacterium sibiricum</i>              | 3,040,786 | 3007  | 135 | 46 |
| <i>Clostridium massiliodielmoense</i>         | 2,759,335 | 2491  | 122 | 48 |
| <i>Clostridium botulinum</i>                  | 3,858,511 | 3669  | 124 | 46 |
| <i>Clostridium acetobutylicum</i>             | 3,903,260 | 3652  | 121 | 43 |
| <i>Bacillus cereus</i>                        | 5,419,036 | 5398  | 139 | 52 |
| <i>Bacillus subtilis</i>                      | 4,215,606 | 4331  | 135 | 49 |
| <i>Bacillus tuaregi</i>                       | 4,863,531 | 4440  | 136 | 50 |
| <i>Bacillus mediterraneensis</i>              | 3,340,964 | 3219  | 134 | 48 |
| <i>Rhodopirellula baltica</i>                 | 7,145,576 | 7325  | 106 | 46 |
| <i>Thermus thermophilus</i>                   | 2,116,056 | 1973  | 105 | 48 |
| <i>Deinococcus peraridilitoris</i>            | 4,513,714 | 3636  | 122 | 49 |



|                                               |            |       |     |    |
|-----------------------------------------------|------------|-------|-----|----|
| <i>Acidothermus cellulolyticus</i>            | 2,443,540  | 2157  | 107 | 45 |
| <i>Mycobacterium abscessus</i>                | 5,090,491  | 4920  | 116 | 47 |
| <i>Salinispora arenicola</i>                  | 5,786,361  | 4917  | 126 | 52 |
| <i>Streptomyces coelicolor</i>                | 9,054,847  | 7825  | 128 | 46 |
| <i>Streptomyces bingchengensis</i>            | 11,936,683 | 10022 | 136 | 46 |
| <i>Chlorobium tepidum</i>                     | 2,154,946  | 2255  | 105 | 44 |
| <i>Chlorobium phaeobacteroides</i>            | 3,133,902  | 2650  | 115 | 44 |
| <i>Gramella forsetii</i>                      | 3,798,465  | 3584  | 97  | 43 |
| <i>Bacteroides thetaiotaomicron</i>           | 6,293,399  | 4712  | 100 | 44 |
| <i>Bacteroides congonensis</i>                | 6,373,337  | 4723  | 103 | 43 |
| <i>Chitinophaga pinensis</i>                  | 9,127,347  | 7192  | 118 | 47 |
| <i>Opitutus terrae</i>                        | 5,957,605  | 4612  | 100 | 40 |
| <i>Thermosiphon melanesiensis</i>             | 1,915,238  | 1879  | 108 | 46 |
| <i>Chloroflexus aurantiacus</i>               | 5,258,541  | 3853  | 112 | 41 |
| <i>Caldilinea aerophila</i>                   | 5,144,873  | 4,119 | 121 | 45 |
| <i>Roseiflexus castenholzii</i>               | 5,723,298  | 4330  | 115 | 40 |
| <i>Gloeobacter violaceus</i>                  | 4,659,019  | 4430  | 116 | 45 |
| <i>Trichormus variabilis</i>                  | 7,105,752  | 5039  | 114 | 40 |
| <i>Nostoc punctiforme</i>                     | 9,059,191  | 6087  | 119 | 45 |
| <i>Sulfurimonas denitrificans</i>             | 2,201,561  | 2096  | 94  | 41 |
| <i>Arcobacter butzleri</i>                    | 2,341,251  | 2259  | 92  | 44 |
| <i>Gallibacterium anatis</i>                  | 2,694,139  | 2494  | 133 | 50 |
| <i>Helicobacter acinonychis</i>               | 1,557,588  | 1612  | 95  | 42 |
| <i>Arcobacter nitrofigilis</i>                | 3,192,235  | 3126  | 103 | 42 |
| <i>Desulfovibrio vulgaris</i>                 | 3,773,159  | 3379  | 127 | 53 |
| <i>Gluconacetobacter diazotrophicus</i>       | 3,914,947  | 3472  | 143 | 46 |
| <i>Caulobacter crescentus</i>                 | 4,042,929  | 3886  | 141 | 49 |
| <i>Rhodospirillum rubrum</i>                  | 4,406,557  | 3791  | 138 | 47 |
| <i>Dechloromonas aromatica</i>                | 4,501,104  | 4171  | 128 | 51 |
| <i>Shewanella denitrificans</i>               | 4,545,906  | 3754  | 132 | 49 |
| <i>Psychromonas ingrahamii</i>                | 4,559,598  | 3545  | 136 | 50 |
| <i>Rhodobacter sphaeroides</i>                | 4,602,977  | 3885  | 142 | 47 |
| <i>Geobacter bemidjiensis</i>                 | 4,615,150  | 4051  | 127 | 52 |
| <i>Aeromonas hydrophila</i>                   | 4,744,448  | 4122  | 140 | 49 |
| <i>Chromobacterium violaceum</i>              | 4,751,080  | 4407  | 136 | 53 |
| <i>Bordetella petri</i>                       | 5,264,383  | 5,035 | 135 | 46 |
| <i>Klebsiella aerogenes</i>                   | 5,280,350  | 4912  | 161 | 51 |
| <i>Xanthomonas axonopodis</i>                 | 5,296,525  | 4245  | 128 | 50 |
| <i>Polaromonas naphthalenivorans</i>          | 5,366,143  | 4084  | 126 | 52 |
| <i>Colwellia psychrerythraea</i>              | 5,373,180  | 4910  | 139 | 50 |
| <i>Pseudomonas syringae</i>                   | 6,093,698  | 5482  | 141 | 50 |
| <i>Pseudomonas aeruginosa</i>                 | 6,264,404  | 5571  | 143 | 53 |
| <i>Achromobacter xylosoxidans</i>             | 6,813,182  | 6459  | 139 | 49 |
| <i>Ralstonia eutropha/Cupriavidus necator</i> | 8,480,857  | 6065  | 149 | 49 |
| <i>Burkholderia gladioli</i>                  | 8,899,459  | 6704  | 149 | 53 |
| <i>Microvirga massiliensis</i>                | 9,172,134  | 7977  | 150 | 47 |
| <i>Bradyrhizobium diazoefficiens</i>          | 9,105,828  | 8,317 | 150 | 48 |

|                                            |            |       |     |    |
|--------------------------------------------|------------|-------|-----|----|
| <i>Sorangium cellulosum</i>                | 13,033,779 | 9384  | 138 | 54 |
| <i>spirochaeta smaragdinae</i>             | 4,653,970  | 4219  | 124 | 56 |
| <i>Treponema pallidum</i> DAL-1            | 1,139,971  | 1,059 | 76  | 39 |
| <i>Treponema phagedenis</i>                | 3,372,116  | 2,930 | 113 | 52 |
| <i>Treponema denticola</i>                 | 2,795,521  | 2626  | 106 | 47 |
| <i>Fusobacterium nucleatum</i>             | 2,174,500  | 2067  | 102 | 45 |
|                                            |            |       |     |    |
| <i>Spodoptera frugiperda</i>               | 156,922    | 123   | 1   | 0  |
| <i>AfricanSwineFeverVirus</i>              | 182,284    | 156   | 0   | 0  |
| <i>Ambystoma tigrinum</i>                  | 106,332    | 95    | 0   | 0  |
| <i>Aedes Invertebrate iridescent virus</i> | 191,100    | 126   | 0   | 0  |
| <i>Marseillevirus marseillevirus T19</i>   | 368,454    | 457   | 2   | 0  |
| <i>Bodo saltans virus</i>                  | 1,385,869  | 1143  | 7   | 3  |
| <i>Crovirus</i>                            | 617,453    | 544   | 5   | 2  |
| <i>Acanthamoeba polyphaga mimivirus</i>    | 1,181,549  | 979   | 8   | 2  |
| <i>Tupanvirus soda lake</i>                | 1,439,508  | 1359  | 14  | 7  |
| <i>Yasminevirus</i>                        | 2,126,343  | 1624  | 10  | 5  |
| <i>ATCV1</i>                               | 288,047    | 860   | 1   | 0  |
| <i>Ectocarpus siliculosus</i>              | 335,593    | 240   | 0   | 0  |
| <i>Orpheovirus</i>                         | 1,473,573  | 2398  | 3   | 2  |
| <i>Cedratvirus massiliensis</i>            | 589,068    | 574   | 2   | 0  |
| <i>Pithovirus sibericum ORFome</i>         | 610,033    | 467   | 1   | 0  |
| <i>Amsacta moorei entomopoxvirus</i>       | 232,392    | 294   | 1   | 0  |
| <i>Faustovirus E12</i>                     | 466,265    | 492   | 2   | 0  |
| <i>Medusavirus</i>                         | 362,811    | 461   | 0   | 0  |
| <i>Pandoravirus salinus</i>                | 2,473,870  | 2542  | 3   | 1  |
| <i>Mollivirus sibericum</i>                | 651,523    | 523   | 2   | 0  |
| <i>Kaumoebavirus</i>                       | 350,731    | 264   | 1   | 0  |
| <i>Pacmanvirus</i>                         | 395,405    | 465   | 2   | 0  |
|                                            |            |       |     |    |
| <i>Homo sapiens</i>                        | 16,569     | 13    | 0   | 0  |
| <i>Reclinomonas americana</i>              | 69,034     | 67    | 8   | 7  |
| <i>Saccharomyces cerevisiae</i>            | 89,507     | 18    | 0   | 0  |
| <i>Anopheles gambiae</i>                   | 15,363     | 13    | 0   | 0  |
| <i>Acanthamoeba castellanii</i>            | 41,591     | 40    | 1   | 1  |
| <i>Pediculus humanus</i>                   | 40,023     | 11    | 0   | 0  |
| <i>Ostreococcus tauri</i>                  | 44,237     | 43    | 0   | 0  |
|                                            |            |       |     |    |
| <i>Ostreococcus tauri</i>                  | 71,666     | 60    | 0   | 0  |
| <i>Micromonas commoda</i>                  | 72,585     | 57    | 0   | 0  |
